## 1 **TGF- $\beta$ signaling is critical for maintenance of the tendon cell fate**

2 Guak-Kim Tan<sup>1</sup>, Brian A. Pryce<sup>1</sup>, Anna Stabio<sup>1</sup>, John V. Brigande<sup>2</sup>, ChaoJie Wang<sup>3</sup>, Zheng Xia<sup>3</sup>,  
3 Sara F. Tufa<sup>1</sup>, Douglas R. Keene<sup>1</sup> and Ronen Schweitzer<sup>1,\*</sup>

4 <sup>1</sup> *Research Division, Shriners Hospital for Children, Portland, OR 97239, USA.*

5 <sup>2</sup> *Oregon Hearing Research Center, Oregon Health & Science University, Portland, OR 97239,*  
6 *USA.*

7 <sup>3</sup> *Computational Biology Program, Oregon Health & Science University, Portland, OR 97239, USA.*

8 \* Correspondence: [schweitz@ohsu.edu](mailto:schweitz@ohsu.edu)

9

10

### 11 **Abstract**

12 Studies of cell fate focus on specification, but little is known about maintenance of the  
13 differentiated state. We find that TGF $\beta$  signaling plays an essential role in maintenance of the  
14 tendon cell fate. To examine the role TGF $\beta$  signaling in tenocytes TGF $\beta$  type II receptor was  
15 targeted in the Scleraxis cell lineage. Tendon development was not disrupted in mutant  
16 embryos, but shortly after birth tenocytes lost differentiation markers and reverted to a more  
17 stem/progenitor state. Targeting of *Tgfbr2* using other Cre drivers did not cause tenocyte  
18 dedifferentiation suggesting a critical significance for the spatio-temporal activity of *ScxCre*.  
19 Viral reintroduction of *Tgfbr2* to mutants was sufficient to prevent and even rescue mutant  
20 tenocytes suggesting a continuous and cell-autonomous role for TGF $\beta$  signaling in cell fate  
21 maintenance. These results uncover the critical importance of molecular pathways that  
22 maintain the differentiated cell fate and a key role for TGF $\beta$  signaling in these processes.

23

24

25

26

27

28

29

## 30 **Introduction**

31 Studies of cell fate determination are in most cases focused on the signaling pathways and  
32 transcription factors that direct naïve cells to assume a specific cell fate (Li et al., 2012; James,  
33 2013; Huang et al., 2015). It is commonly accepted that once fully differentiated the cells enter  
34 a stable cellular phenotype, but relatively little is known about the molecular mechanisms that  
35 reinforce and maintain this differentiated state. Maintenance of the differentiated state is  
36 however essential for tissue function and identifying the molecular pathways involved in these  
37 processes may be of great importance for understanding tissue homeostasis and pathology.

38 Tendons are connective tissues that transmit forces from muscle to bone to generate  
39 movement (Kannus, 2000). Despite their importance to overall musculoskeletal function and  
40 their slow and limited healing capabilities, relatively little is known about tendon development,  
41 the tendon cell fate, maturation and pathology. Elucidating the key molecular regulators of  
42 these processes is thus essential for improvements in the management of tendon healing, the  
43 treatment of tendinopathy and for bioengineering efforts for this tissue.

44 A limited number of transcription factors were so far identified as key regulators of the  
45 tendon cell fate including most notably, Scleraxis (Scx), a bHLH transcription factor expressed in  
46 tendon cells from progenitor stages and through development (Schweitzer et al., 2001) and  
47 Mohawk (Mkx), an atypical homeobox protein with essential roles in the development of the  
48 collagen matrix in tendons (Ito et al., 2010). Prototypic markers for the tendon cell fate also  
49 include the transmembrane protein tenomodulin (Tnmd) and collagen type I (Kannus, 2000;  
50 Huang et al., 2015), the major building blocks of the tendon fibrillar extracellular matrix that  
51 mediates the transmission of force by tendons.

52 Previous studies have also established a central role for the transforming growth factor- $\beta$   
53 (TGF $\beta$ ) signaling pathway in early events of tendon development (Pryce et al., 2009; Havis et al.,  
54 2016). Notably, TGF $\beta$  is a potent inducer of Scleraxis (Scx) both *in vivo* and in cultured cells and  
55 disruption of TGF $\beta$  signaling in mouse limb bud mesenchyme resulted in complete failure of  
56 tendon formation (Pryce et al., 2009). This phenotype manifested at the onset of embryonic  
57 tendon development but robust expression of TGF $\beta$  ligands and associated molecules in later

58 stages of tendon development suggested possible additional roles for TGF $\beta$  signaling in tendon  
59 development (Kuo et al., 2008; Pryce et al., 2009). Moreover, subcutaneous application of  
60 growth and differentiation factors (GDFs), members of the TGF $\beta$  superfamily, can induce  
61 ectopic neo-tendon formation in rats (Wolfman et al., 1997). The goal of this study was  
62 therefore to ask if TGF $\beta$  signaling plays essential roles at later stages of tendon development.

63 The TGF $\beta$  superfamily comprises secreted polypeptides that regulate diverse developmental  
64 processes ranging from cellular growth, differentiation and migration to tissue patterning and  
65 morphogenesis (Santibanez et al., 2011; Sakaki-Yumoto et al., 2013). These ligands act by  
66 binding to transmembrane type II receptors, which in turn recruit and activate a type I receptor.  
67 The activated receptor complex subsequently phosphorylates and activates receptor-regulated  
68 transcription factors called Smads (Smad2/3 for TGF $\beta$  signaling) that subsequently complex  
69 with the common-mediator Smad4 and translocate into the nucleus where they promote or  
70 repress responsive target genes (Vander Ark et al., 2018). The TGF $\beta$  proper ligands (TGF $\beta$ 1-3) all  
71 bind to a single type II receptor. Consequently, disrupting this one receptor is sufficient to  
72 abrogate all TGF $\beta$  signaling. To test for additional roles of TGF $\beta$  signaling in tendon  
73 development and biology we wanted to bypass the early essential function in tendon formation,  
74 and decided to target TGF $\beta$  type II receptor (Tgfbr2) explicitly in tendon cells. We therefore  
75 targeted the receptor using ScxCre (Blitz et al., 2013), a tendon specific Cre driver, so that TGF $\beta$   
76 signaling will be disrupted specifically in tendon cells and only after the initial events of tendon  
77 formation.

78 We find that tendon differentiation function and growth during embryonic development  
79 was not disrupted following targeted deletion of TGF $\beta$  signaling in tenocytes, but shortly after  
80 birth the cells lost tendon cell differentiation markers and reverted to a more progenitor-like  
81 state. Moreover, viral reintroduction of Tgfbr2 to mutant cells was sufficient to prevent  
82 dedifferentiation and even to rescue the tendon cell fate in a cell-autonomous manner,  
83 highlighting a continuous and essential role of TGF $\beta$  signaling in maintenance of the tendon cell  
84 fate.

85

## 86 **Results**

### 87 **Targeting TGF $\beta$ type II receptor in Scx-expressing cells resulted in tendon disruption and limb** 88 **abduction**

89 Our previous studies showed that disruption of TGF $\beta$  signaling in limb mesenchyme resulted in  
90 the complete failure of tendon formation (Pryce et al., 2009). To examine later roles of TGF $\beta$   
91 signaling in tendon development we targeted *Tgfbr2* with *ScxCre* thereby bypassing the early  
92 role of TGF $\beta$  signaling for tendon development. *Tgfbr2*;*ScxCre* mutant embryos indeed  
93 developed a complete network of tendons by E14.5, indicating they have bypassed the early  
94 requirement for TGF $\beta$  signaling in tendon development (Fig. 1A).

95 Mutant tendon development was not perturbed through embryogenesis and mutant pups  
96 appeared normal at birth (Fig. 1C). However, by day 3 after birth (P3), mutant pups showed  
97 physical abnormalities that manifested in abducted paws, splayed limbs (Fig. 1C, black  
98 arrowhead) and severe movement limitations. Examination of forelimb tendons of P7 mutant  
99 pups using the tendon reporter *ScxGFP* revealed severe tendon disruptions. A few lateral  
100 tendons, e.g. the extensor carpi radialis longus tendon underwent fragmentation and  
101 disintegrated (Fig. 1B, yellow arrowhead and Fig. S1) whereas the majority of other tendons,  
102 notably the extensor digitorum communis tendons, retained structural integrity with a  
103 substantial loss of *ScxGFP* signal (Fig. 1B, white arrowhead). The substantial loss of *ScxGFP*  
104 signal was also detected in all tendons and related tissues, including hindlimb- and tail tendons,  
105 as well as ligaments and annulus fibrosus of the intervertebral disc (Fig. 1D,E). Movement  
106 limitations were exacerbated as mutant pups became older and all mutants died at or before  
107 P14. This phenotypic progression was observed in most mutant pups but intriguingly, in rare  
108 cases (~2%) the mutant pups showed physical abnormalities and severe tendon phenotypes  
109 already at birth.

110 A closer examination of the mutant embryos identified the first indication of a tendon  
111 phenotype already at E16.5. The flexor carpi radialis tendons of mutant embryos were  
112 consistently torn by E16.5 (Fig. S2). Interestingly, this phenotype was highly reproducible while  
113 the patterning and development of other tendons in mutant embryos was not perturbed

114 through embryogenesis. Moreover, expression of the prototypic tenocyte markers *Scx*, *Tnmd*  
115 and collagen I (Fig. 2A-D) and the development of the collagen matrix were not disrupted in any  
116 tendon of mutant embryos (Fig. 2E,F), including the flexor carpi radialis tendon before it  
117 snapped. A direct cause for the specific tear of the flexor carpi radialis tendon in mutant  
118 embryos was not identified to date.

119 Tendons are rich in collagen fibers that provide structural integrity to the tendons and  
120 transmit the forces generated by muscle contraction (Kannus, 2000). Since young mutant pups  
121 exhibited movement difficulties we first examined possible structural effects in the collagen  
122 matrix. The ultrastructure of mutant tendons that remained intact was therefore analyzed by  
123 transmission electron microscopy (TEM). Surprisingly, despite the functional defects starting  
124 around P3, collagen fibers in mutant tendons appeared organized and indistinguishable from  
125 those of wild-type (WT) littermates at this stage (Fig. 3). Apparent collagen degradation was  
126 observed only in older mutant pups ( $\geq$  P7) (Fig. 3), suggesting the disruption to the matrix of  
127 these tendons may be a secondary consequence of the cellular changes in these mutants  
128 and/or of their movement difficulties. Furthermore, epitenon, a monolayer of cells that engulf  
129 and define the boundary of the tendon (Kannus, 2000) (Fig. 3, black arrowhead), was gradually  
130 disrupted and in some cases was almost undetectable in older mutant pups (Fig. 3, white  
131 arrowhead), suggesting that loss of the tendon boundary is an additional feature of the  
132 phenotype in these mutants.

133

#### 134 **Loss of the tendon cell fate in mutant tenocytes**

135 As mentioned earlier, the *ScxGFP* signal in mutant tendons appeared patchy contrary to the  
136 smooth appearance of WT tendons (Fig. 1B), suggesting a disruption at the cellular level. To  
137 examine this phenotype at the cellular level we analyzed cross sections through the extensor  
138 communis tendons of P7 WT and mutant pups. In P7 WT pups, all tendon cells were positive for  
139 *ScxGFP*, *Tnmd* and *Col1a1* (Fig. 4A,C). Conversely, most cells in mutant tendons lost the *ScxGFP*  
140 signal and tendon marker gene expression (Fig. 4B, white arrowhead and 4C). Interestingly,  
141 some cells in mutant tendons retained *ScxGFP* signal and appeared rounded and enlarged from  
142 P3 onwards (Fig. 4B, yellow arrowhead). Further investigation suggests that these cells are

143 newly recruited tendon cells. Analysis of this aspect of the mutant phenotype will be published  
144 in a separate manuscript (Tan et al., manuscript in preparation).

145 The fact that most cells in the mutant tendons do not express tendon markers is surprising,  
146 since the cells in these tendons were functional tenocytes at embryonic stages as evidenced by  
147 tendon marker gene expression and by the development of a functional collagen matrix (Fig. 2).  
148 We next sought to determine if the ScxGFP-negative cells were indeed tendon cells that lost  
149 tendon gene expression or if the mutant tendons were simply repopulated by non-tenogenic  
150 cells. Using TUNEL assay we did not detect cell death in mutant tendons and the rate of  
151 tenocyte proliferation as examined by EdU assay was also not altered in these tendons (Fig.  
152 S3A,B), suggesting the cell population of mutant tendons was not altered. To directly determine  
153 if the cells in mutant tendons were tenocytes whose cell fate was altered, we took advantage of  
154 the fate mapping feature of the Rosa26-tdTomato (RosaT) Cre reporter system (Madisen et al.,  
155 2010). When the reporter is activated by ScxCre, expression of the RosaT reporter is restricted  
156 to the Scx-expressing cells and their progeny. We found that all ScxGFP-negative cells within  
157 mutant tendons were positive for the RosaT reporter (Fig. 4D, white arrowhead), proving that  
158 the cells in the mutant tendons were indeed derived from tenocytes. This result thus  
159 highlighted an unexpected reversibility for the tendon cell fate where it was possible for  
160 committed and functional tenocytes to lose their differentiation status.

161 To test if a continuous requirement for TGF $\beta$  signaling is essential for maintenance of the  
162 tendon cell fate, we next targeted *Tgfb2* either selectively in Scx-expressing cells or in all cells  
163 using the tamoxifen-inducible ScxCreERT2 (Howell et al., 2017) and RosaCreERT2 (Madisen et  
164 al., 2010) drivers respectively during different developmental stages (E13 and P0). Interestingly  
165 the cell fate of targeted cells was not disrupted in these mutants as evidenced by retention of  
166 differentiation marker expression (data not shown). This result suggests that tenocyte  
167 dedifferentiation in the *Tgfb2*;ScxCre mutant tendons is dependent not simply on the loss of  
168 TGF $\beta$  signaling in these cells but also on additional features in these mutants associated with  
169 the specific spatial and temporal features of ScxCre activity.

170

171

## 172 **Mutant tenocytes acquired stem/progenitor features**

173 Loss of cell differentiation marker can be the outcome of a few cellular processes, including  
174 most notably cell death, change of cell fate (transdifferentiation) or reversion to a less  
175 differentiated state (dedifferentiation) (Cai et al., 2007; Talchai et al., 2012; Tata et al., 2013).  
176 As aforementioned, we found no apparent cell death in mutant tendons (Fig. S3A). Using  
177 histological staining for the prototypic markers of osteocytes, adipocytes and chondrocytes we  
178 found that loss of tendon gene expression in the cells of mutant tendons was also not due to  
179 transdifferentiation (Fig. S3C), suggesting that the changes in mutant tendons may reflect a  
180 process of cellular dedifferentiation.

181 One hallmark of cellular dedifferentiation is the loss of differentiation markers, which is  
182 what we observed in mutant tendon cells. When cells dedifferentiate they also assume  
183 stemness features e.g. colony forming potential, and in most cases these cells also acquire  
184 expression of stem/progenitor cell markers (Sun et al., 2011; Tata et al., 2013; Nusse et al.,  
185 2018). To date, very little is known about the specific gene expression and cellular behavior of  
186 embryonic tendon progenitors. The only defined feature of these cells is the expression of the  
187 Scx tendon progenitor marker (Schweitzer et al., 2001), which was evidently lost in the mutant  
188 tendon cells. We therefore next directed our attention to similarities with stem/progenitor cells  
189 isolated from tendons (tendon-derived stem/progenitor cells) (Bi et al., 2007; Rui et al., 2010;  
190 Zhang and Wang, 2010; Mienaltowski et al., 2013) and with stem/progenitor cell markers  
191 reported in other studies (Blitz et al., 2013; Dymant et al., 2013; Tan et al., 2013; Runesson et  
192 al., 2015; Yin et al., 2016).

193 To test the colony-forming capacity of the mutant tendon cells, P7 mutant tendons were  
194 dissociated and FACS-sorted to collect ScxGFP-negative and RosaT-positive cells, which were  
195 then seeded at one cell per well in 96-well plates. As shown in Fig. 5A, about 1-2% of cells  
196 (ScxGFP-positive and RosaT-positive) isolated from tendons of P7 WT and heterozygous  
197 controls formed colonies in culture, similar to the frequency of colony forming cells reported in  
198 other studies (Bi et al., 2007; Rui et al., 2010). On the other hand, we found a significant 8-fold  
199 increase ( $p < 0.01$ ) in the frequency of colony forming cells in mutant tendons (Fig. 5A).

200 We next screened the mutant tendons for expression of stem/progenitor cell markers. We  
201 found that while *Tgfbr2;ScxCre* mutant tendon cells exhibited weak or negative expression of  
202 some progenitor markers e.g. CD90.2, Oct-3/4, Sox2, nucleostemin, alpha-SMA, nestin and Sox9  
203 (data not shown), the mutant tendon cells gradually acquired expression of stem cell antigen-1  
204 (Sca-1) and CD44 in postnatal stages (Fig. 5B). Notably, expression of Sca-1 was undetectable  
205 and CD44 was detected only in very few WT tendon cells, but surprisingly robust expression of  
206 these markers was detected in the epitenon (Fig. 5C, white arrowheads), a possible source of  
207 progenitor cells (Mendias et al., 2012; Dymant et al., 2013; Mienaltowski et al., 2013). The  
208 similarity of marker expression between the mutant tenocytes and epitenon cells therefore  
209 reinforces the notion that the mutant tenocytes acquired progenitor features.

210 Dedifferentiation is frequently associated with reversion to an earlier progenitor cell fate  
211 (Cai et al., 2007). We therefore next examined the expression of these markers during  
212 embryonic tendon development. At E12.5, when tendon progenitors are first detected (Pryce et  
213 al., 2009), expression of Sca-1 and CD44 could not be detected in ScxGFP-positive tendon  
214 progenitors (data not shown). At E14.5, at the onset of tendon cell differentiation, we found  
215 low or no expression of both markers in the differentiating tendon cells. Robust positive  
216 staining for both markers was however detected in the cells that surround the tendon at this  
217 stage, likely the precursors of the epitenon/paratenon (Fig. S4). Similar expression patterns  
218 were also found in mutant embryos (data not shown). These findings suggest that Sca-1 and  
219 CD44 are not markers for tendon progenitor *in vivo*, and possibly simply reflect a generic  
220 stemness state of the dedifferentiated mutant tendon cells.

221 Taken together, our findings show that mutant tendon cells acquired some stem/progenitor  
222 properties while losing their cell fate. It should be noted however that although these  
223 dedifferentiated tendon cells demonstrate some stem/progenitor properties, absence of TGF $\beta$   
224 signaling in these cells might prevent them from acquiring the full spectrum of stemness or  
225 plasticity.

226

227

228



## 229 **Molecular profile of the dedifferentiated mutant tenocytes**

230 We next performed single cell RNA sequencing analysis (scRNASeq) to establish a  
231 comprehensive profile of the cellular state and molecular changes in mutant tenocytes. A  
232 targeted retention of 2300-2600 cells from P7 WT- and mutant tendon was obtained, and the  
233 transcriptomes were analyzed using the 10X Genomics platform. Using unsupervised  
234 hierarchical clustering analysis, we identified two major clusters corresponding to WT tenocytes  
235 and mutant (dedifferentiated) cells in the respective samples. Expression of close to 1000 genes  
236 (mean UMI count  $\geq 0.5$ , adjusted  $p$ -value  $\leq 0.05$ ) was identified in each of these clusters.

237 Pairwise comparison of the gene set between the P7 WT tenocyte and mutant cell clusters  
238 was next performed to determine changes in gene expression associated with tenocyte  
239 dedifferentiation. In total, expression of 186 genes was significantly different between the two  
240 cell populations ( $\geq 2$ -fold change and adjusted  $p$ -value  $\leq 0.05$ ), in which expression of 89 genes  
241 was upregulated and 97 genes was downregulated in the mutant tendon cells (Table S2).  
242 Almost 30% of the downregulated genes (29 genes) were identified in transcriptome analyses  
243 as tendon distinctive genes [(Havis et al., 2014) and our unpublished data]. Notably, the genes  
244 *Scx*, *Fmod*, *Tnmd*, *Pdgfrl*, *Col1a1*, *Col1a2*, *Col11a1* and *Col11a2* were among the top 25 down-  
245 regulated genes in *Tgfr2;ScxCre* mutant tendon cells (Table 1), further confirming the loss-of-  
246 cell fate phenotype in these cells. On the other hand, expression of the *Ly6a* gene (encoding  
247 Sca-1) was greatly enriched in P7 mutant cells, corroborating the IHC findings presented above  
248 (Table 2 and Fig. 5B). Moreover, we also found a significant increase in the expression of the  
249 *CD34* gene, another common marker for diverse progenitor cells. This observation was further  
250 confirmed at protein level, where positive immunostaining for CD34 was detected in mutant  
251 cells but not in normal tendon cells (Fig. 6A). Interestingly, the genes upregulated in the mutant  
252 cells included several genes (*Dpt*, *Anxa1*, *CD34*, *CD44*, *Mgp* and *Mfap5*) whose expression was  
253 previously reported to be enriched during embryonic tendon development (Havis et al., 2014).  
254 These findings thus do not only lend support to our notion that the mutant cells lost their  
255 differentiation state, but also suggest the possibility of induction of some developmental  
256 programs in these cells, a general feature in cellular dedifferentiation (Tata et al., 2013; Stocum,  
257 2017; Nusse et al., 2018).

258 To gain insights into biological functions activated in the P7 mutant cells, differentially  
259 expressed genes (DEGs) in these cells (Table S2) were further analyzed via GO enrichment tools  
260 clusterProfiler (Yu et al., 2012) and PANTHER Classification System (<http://pantherdb.org/>).  
261 Intriguingly, GO enrichment analysis revealed that one of the prominent biological changes  
262 observed in P7 mutant cells was upregulation of gene sets associated with wound healing (Fig.  
263 6B and Table S3). These genes include protease inhibitors (*Serpine2*, *Serping1*), inflammatory  
264 mediator *Anxa1* and extracellular matrix (*Col3a1* and *Col5a1*). This finding suggests a possible  
265 role for tendon cells in the responses to pathological conditions, in line with findings reported  
266 by others (Dakin et al., 2015; Stolk et al., 2017; Schoenenberger et al., 2018). On the other hand,  
267 many biological processes downregulated in P7 mutant cells involved collagen synthesis and  
268 organization (Fig. 6C and Table S3). Since tendon biology is not annotated in most databases,  
269 changes in the collagen matrix, the most prominent structural component in tendons is the  
270 best indicator for the disruption of the tendon cell fate. Disruption of the collagen matrix in  
271 tendons was also detected in older mutant pups by ultrastructural analysis using TEM (Fig. 3).

272 Using PANTHER, we also investigated which protein classes were significantly altered in P7  
273 mutant cells relative to WT tenocytes. Genes found to be most downregulated in mutant cells  
274 encode for receptors, signaling molecules, membrane traffic proteins and ECM (Table 3A). On  
275 the other hand, the upregulated genes in the mutant cells encode most prominently for  
276 proteins involved in nucleic acid binding, enzyme modulators, cytoskeletal protein, signaling  
277 molecules and transcription factors (Table 3B). Notably, expression of the activating protein 1  
278 (AP-1) transcriptional complex, associated with numerous cellular processes including cell fate  
279 regulation (Hess et al., 2004), was significantly induced in mutant cells. Expression of both AP-1  
280 components, i.e. the *Fos* and *Junb* genes was induced more than two fold, and the *Jun* gene was  
281 induced only slightly less than 2 fold. Moreover, the *Id3* gene encoding for a general bHLH  
282 transcription factor inhibitor was also induced. Due to its broad selection of targets, *Id3* was  
283 also implicated in numerous cellular processes including the regulation of cellular  
284 differentiation (Norton, 2000). A possible role for these transcriptional activities in tenocyte  
285 dedifferentiation will be addressed in future studies.

286 We next conducted PANTHER Pathway Analysis using different values of the filter  
287 parameter (mean UMI count and fold change) for enriching DEGs in P7 mutant cells. In general,  
288 we found that pathways that stood out as relevant for this study included integrin signaling,  
289 insulin/IGF, Wnt and inflammation mediated by chemokine and cytokine signaling pathways  
290 (Table 4). Insulin/IGF- and Wnt signaling are often implicated in cell proliferation and cell fate  
291 specification (Stewart and Rotwein, 1996; Sadagurski et al., 2006; Goessling et al., 2009; Salazar  
292 et al., 2016). It is interesting to note that their activation has also been associated with cellular  
293 dedifferentiation in skin, gut and neuron (Weber et al., 2003; Zhang et al., 2012; Perekatt et al.,  
294 2018). Further investigation is required to determine the specific roles of these signaling  
295 pathways in tenocyte dedifferentiation.

296

### 297 **Tenocyte dedifferentiation is dependent on cell autonomous loss of TGF $\beta$ signaling**

298 Lastly we wanted to ask if tenocyte dedifferentiation in these mutants reflected a cell  
299 autonomous requirement for TGF $\beta$  signaling in tenocytes, or if it was the result of global  
300 changes that occurred in mutant tendons. To address this question we reactivated TGF $\beta$   
301 signaling in isolated mutant tendon cells and determined the effects on tenocyte  
302 dedifferentiation. We previously found that transuterine injection of AAV viruses into  
303 embryonic limbs resulted in sporadic infection of limb tendons [unpublished data and (Huang et  
304 al., 2013)]. We therefore decided to address this question by injection of a Cre-activatable virus  
305 encoding an epitope tagged version of the receptor, AAV1-FLEX-Tgfbr2-V5 (Fig. 7A). Injection of  
306 this virus into embryonic mutant limbs would result in expression of Tgfbr2-V5 only in infected  
307 tendon cells due to the tendon-restricted activity of ScxCre in mutant embryos.

308 AAV1-FLEX-Tgfbr2-V5 was injected into mutant limbs at two stages during embryonic  
309 tendon development: (a) E12.5 at the onset of ScxCre activity, ensuring that Tgfbr2-V5  
310 expression will be activated in infected cells concurrent with the loss of the endogenous Tgfbr2,  
311 resulting in isolated Tgfbr2 expressing cells surrounded by mutant cells. (b) E16.5, before the  
312 onset of tenocyte dedifferentiation in mutant embryos. Interestingly, targeted re-expression of  
313 Tgfbr2-V5 in individual mutant tendon cell at both developmental stages was able to prevent

314 the loss of tendon markers as observed in postnatal pups (Fig. 7B-D), suggesting a cell  
315 autonomous role for TGF $\beta$  signaling in maintenance of the tendon cell fate.

316 Recognizing that cell autonomous activity of Tgfbr2-V5 was sufficient to prevent  
317 dedifferentiation of mutant tenocytes, we next wanted to test if reactivation of TGF $\beta$  signaling  
318 in a dedifferentiating tenocyte could also reverse the process and rescue a tenocyte from  
319 dedifferentiation. Activity of ScxCre may be lost in the dedifferentiating tenocytes due to the  
320 loss of Scx expression and therefore of Scx enhancer driven expression of Cre in ScxCre mice.  
321 We therefore used in this case a virus encoding constitutive expression of Tgfbr2 in which the  
322 virus was tagged with a FLAG Tag (AAV1-Tgfbr2-FLAG). The virus was injected locally into P1  
323 mutant limbs and the limbs were harvested at P7. We found that all infected mutant tendon  
324 cells expressed the tendon markers ScxGFP and tenomodulin (Fig. 7D and Fig. S5A), suggesting  
325 that reactivation of TGF $\beta$  signaling was indeed sufficient to rescue the dedifferentiated  
326 tenocytes. Taken together, these findings demonstrate that TGF $\beta$  signaling is sufficient to  
327 prevent and to rescue the loss-of-tendon cell fate in a cell-autonomous manner.

328 The constitutive expression of Tgfbr2-FLAG driven by the AAV1-Tgfbr2-FLAG virus ensured  
329 that the neonatal infection with this virus resulted in Tgfbr2-FLAG expression both within and  
330 outside of tendons. Notably, induction of tendon gene expression following activation of  
331 Tgfbr2-FLAG expression was detected only in dedifferentiated tenocytes and not in cells located  
332 outside of tendons (Fig. S5B). It was previously shown that TGF $\beta$  signaling is a potent inducer of  
333 ScxGFP and other tendon markers (Pryce et al., 2009; Maeda et al., 2011; Sakabe et al., 2018).  
334 This result reflects the fact that induction of tendon markers by TGF $\beta$  signaling is context-  
335 dependent and further indicates that the tenocytes in mutant pups have dedifferentiated to a  
336 state with tenogenic potential that retained the capacity to respond to TGF $\beta$  signaling.

337 Taken together these results highlight a surprising cell-autonomous role for TGF $\beta$  signaling  
338 in maintenance of the tendon cell fate. In Tgfbr2;ScxCre mutants tenocyte differentiation and  
339 function are normal during embryonic development but the tenocytes dedifferentiate in early  
340 postnatal stages. Tenocyte dedifferentiation is directly dependent on the loss of TGF $\beta$  signaling  
341 since retention or reactivation of the TGF $\beta$  receptor in isolated cells prevents or reverses the

342 process of dedifferentiation. TGF $\beta$  signaling is thus essential for maintenance of the tendon cell  
343 fate.

344

## 345 **Discussion**

346 In this study we find that the tendon cell fate requires continuous maintenance *in vivo* and  
347 identify an essential role for TGF $\beta$  signaling in maintenance of the tendon cell fate. To examine  
348 the different roles that TGF $\beta$  signaling may play in tendon development the *Tgfbr2* gene was  
349 targeted in *Scx*-expressing cells (*Tgfbr2*;*Scx*Cre mutant), ensuring disruption of TGF $\beta$  signaling in  
350 tendon cells. Mutant embryos appeared normal at birth and showed movement difficulties  
351 from early neonatal stages. Tendon formation and maturation was not affected in mutant  
352 embryos, but one flexor tendon snapped consistently at E16.5 and a few additional tendons  
353 disintegrated in early postnatal stages. Surprisingly, we find that in all other tendons the  
354 resident tenocytes lost tendon gene expression and dedifferentiated, assuming behavior and  
355 gene expression associated with stem/progenitor cells. While a direct loss of TGF $\beta$  signaling in  
356 individual tenocytes was not sufficient to cause tenocyte dedifferentiation, we found that  
357 tenocyte dedifferentiation could be reversed by reactivation of TGF $\beta$  signaling in mutant cells  
358 (Fig. 8). These results uncover an essential role for molecular pathways that maintain the  
359 differentiated cell fate in tenocytes and a key role for TGF $\beta$  signaling in these processes.

360 Dedifferentiation has mostly been studied *in vitro* (Weinberg et al., 2007; Zhang et al., 2010;  
361 Pennock et al., 2015; Mueller et al., 2016; Guo et al., 2017; Nordmann et al., 2017) and there  
362 are only a handful of reported cases of dedifferentiation *in vivo* (Talchai et al., 2012; Tata et al.,  
363 2013; Zhang et al., 2019). It was therefore important to establish if the tenocytes of  
364 *Tgfbr2*;*Scx*Cre mutants indeed dedifferentiated. Cellular dedifferentiation manifests in most  
365 cases by loss of features associated with the differentiated state and reversion to an earlier  
366 progenitor state within their cell lineage. In tendons of *Tgfbr2*;*Scx*Cre mutants we indeed found  
367 that the tenocytes lost tendon gene expression and showed enhanced clonogenic potential.  
368 Moreover, the mutant tenocytes gained expression of the prototypic somatic stem/progenitor  
369 markers *Sca-1*, *CD34* and *CD44* (Holmes and Stanford, 2007; Sung et al., 2008; Hittinger et al.,  
370 2013; Sidney et al., 2014). Notably, of these stem/progenitor markers only *Sca-1* and *CD44* are

371 also expressed at high levels in cultured tendon-derived stem/progenitor cells (Bi et al., 2007;  
372 Mienaltowski et al., 2013). Neither of these markers has so far been established as markers for  
373 tenocytes or for tendon progenitors. However, both expression of the CD34 and CD44 genes  
374 and expression of some additional signature genes identified in the dedifferentiated tenocytes  
375 by the scRNASeq analysis was previously shown to be significantly enriched in E14.5 mouse  
376 limb tendon cells when compared to cells from E11.5 (Havis et al., 2014). These observations  
377 suggest that some aspects of the embryonic tendon development program may be reactivated  
378 in dedifferentiated mutant tendon cells. Interestingly, we found that Sca-1, CD34 and CD44 are  
379 expressed in the wild-type epitenon/paratenon, thin layers of cells that surround the tendon  
380 and has been implicated as a possible source of stem/progenitor cells for tendons  
381 (Mienaltowski et al., 2013; Cadby et al., 2014). We further verified that mutant tendons are not  
382 repopulated by epitenon/paratenon cells since there is no evidence of elimination of the  
383 resident tenocytes by cell death.

384 Most studies of cellular dedifferentiation have focused on the regulation of this process *in*  
385 *vitro*. There is, however, evidence demonstrating this phenomenon *in vivo* especially in the  
386 context of pathological scenarios, as part of the regeneration process. One of the well-studied  
387 examples is limb regeneration in amphibians. Following limb amputation, cells near to the  
388 wound dedifferentiate to blastema, proliferate and eventually re-differentiate to replace all the  
389 components of the lost limb (McCusker et al., 2015). In zebrafish it has also been reported that  
390 following partial heart amputation, sarcomeres in mature cardiomyocytes disassembled, lost  
391 their differentiation gene expression profile and switched to embryonic hyperplastic growth to  
392 replace the missing tissues (Poss et al., 2002). Cellular dedifferentiation has also been observed  
393 in murine mature hepatocytes (Gournay et al., 2002), pancreatic  $\beta$  cells (Talchai et al., 2012)  
394 and skeletal muscle cells (Mu et al., 2011). More recently, Nusse and colleagues (Nusse et al.,  
395 2018) have shown that disruption of the mouse intestinal barrier, via either parasitic infection  
396 or cell death, led to reversion of crypt (epithelial) cells to a fetal-like stem cell state.  
397 Interestingly, expression of Sca-1 was highly induced in these cells, and when cultured the Sca-1  
398 positive crypt cells exhibited characteristics of fetal intestinal epithelium including re-  
399 expression of fetal signature genes and loss of differentiated markers. The results presented in

400 this study therefore suggest that a similar process may be activated in tenocytes as part of the  
401 regenerative process in response to pathology. Taken together, this growing body of evidence  
402 suggests that dedifferentiation may be a generalized cellular response to tissue damage that  
403 warrants further investigation. Moreover, these observations may also suggest that induction  
404 of Sca-1 may serve as a marker for a pathology-related dedifferentiation process. Intriguingly,  
405 Sca-1 positive cells were also found in the wound window in rat patellar tendon incisional injury  
406 model, but in this case it was not determined if Sca-1 expression was associated with  
407 dedifferentiation (Tan et al., 2013). Sca-1 expression has been identified on putative  
408 stem/progenitor cell populations in various tissues (Holmes and Stanford, 2007; Hittinger et al.,  
409 2013), but little is known about its biological function. It may therefore be interesting to  
410 examine whether Sca-1 functions as a stemness marker in dedifferentiated cells or if it also  
411 plays additional roles in cellular responses to pathological conditions.

412 Tenocyte dedifferentiation as observed in this study reveals an unexpected flexibility in the  
413 tendon cell fate where differentiated tenocytes can revert to a progenitor state under the  
414 mutant conditions. Significantly, reintroduction of *Tgfbr2* not only prevented tenocyte  
415 dedifferentiation when it was performed during embryogenesis but was also able to rescue the  
416 cell fate of dedifferentiated tenocytes when the virus was introduced after birth. This result  
417 suggests that TGF $\beta$  signaling may have a continuous role in protecting the differentiated  
418 tenocytes from dedifferentiation, identifying TGF $\beta$  signaling as a key regulator of tendon  
419 homeostasis. Moreover, these results also highlight the importance of the molecular pathways  
420 involved in maintenance of the differentiated cell fate not only for tissue homeostasis and  
421 function, but also for processes associated with tissue regeneration or with the onset and  
422 unfolding of pathology. Previous studies have implicated TGF $\beta$  signaling in cell fate  
423 maintenance in various tissues, e.g. preserving chondrocyte identity in cultures (Bauge et al.,  
424 2013) and suppressing intestinal cell dedifferentiation (Cammareri et al., 2017). While TGF $\beta$   
425 signaling has been associated with different aspects of tendon biology (Pryce et al., 2009; Havis  
426 et al., 2016), to the best of our knowledge this is the first report of its role in maintenance of  
427 the tendon cell fate.

428 The fact that the mutant phenotype was caused by disruption of TGF $\beta$  signaling in tenocytes  
429 and the rescue of the tendon cell fate by virus mediated reintroduction of Tgfbr2 even to  
430 individual mutant cells provides direct evidence for a continuous and cell autonomous role for  
431 TGF $\beta$  signaling in maintenance of the tendon cell fate. However, targeting of Tgfbr2 using both  
432 tendon specific and ubiquitous inducible Cre drivers at different developmental stages did not  
433 result in tenocyte dedifferentiation, suggesting that tenocyte dedifferentiation in these mutants  
434 was dependent on specific spatial and temporal features of the ScxCre driver. These  
435 observations suggest that tenocyte dedifferentiation in these mutants may not merely be the  
436 result of the loss of intrinsic TGF $\beta$  signaling in tendon cells, but rather may be caused by an  
437 interplay between intrinsic loss of TGF $\beta$  signaling and additional external factors contributed by  
438 the environment of the mutant tendons, e.g. cell-cell or cell-matrix interaction.

439 The tendon phenotype of Tgfbr2;ScxCre mutants highlights a likely role for tenocyte  
440 dedifferentiation in regenerative processes in tendons and possibly also in the progression of  
441 tendon pathology. Uncovering the molecular pathways involved in this process may therefore  
442 be important for new strategies for treatments of tendon pathologies. The Tgfbr2;ScxCre  
443 mutants provide a unique opportunity to analyze these pathways, and the experimental  
444 approaches employed in this study may be developed into an experimental paradigm for  
445 molecular dissection of this process. Briefly, transcriptional and epigenetic analyses of the  
446 mutant tenocytes through the dedifferentiation process can provide a landscape of the  
447 molecular changes that initiate and drive the dedifferentiation process. Promising candidates  
448 can then be tested using the AAV-mediated cell fate rescue experiments to identify genes or  
449 groups of genes that can protect the tenocytes from dedifferentiation to establish the  
450 molecular process of cellular dedifferentiation. Of particular interest will be the early molecular  
451 changes in the mutant tenocytes that drive and promote the onset and progression of tenocyte  
452 dedifferentiation.

453 Our findings underscore the fact that the tendon cell fate requires continuous maintenance  
454 and that it is not an irreversible state, a long-standing biological dogma that has been  
455 challenged by recent research (Takahashi and Yamanaka, 2006; Ladewig et al., 2013).  
456 Nevertheless, it is important to recognize that the dramatic cell fate changes in Tgfbr2;ScxCre



457 mutant happens in the context of a genetic modification. The occurrence of such phenomenon  
458 *in vivo* might not be a simple direct outcome of changes to TGF $\beta$  signaling. Most importantly,  
459 while the initiating events for tenocyte dedifferentiation may vary in different scenarios, it is  
460 likely that the molecular events that drive the dedifferentiation process downstream of the  
461 initiation event are similar or related. Uncovering these pathways in this experimental system  
462 may therefore facilitate the analysis of such processes in various other contexts.

463

## 464 **Materials and Methods**

### 465 **Mice**

466 All mouse work was performed in accordance to the guidelines issued by the Animal Care and  
467 Use Committee at Oregon Health & Science University (OHSU). Floxed TGF $\beta$  type II receptor  
468 (Tgfbr2<sup>f/f</sup>) mice (Chytil et al., 2002) were crossed with mice carrying the tendon deleter  
469 Scleraxis-Cre recombinase (ScxCre) (Blitz et al., 2013), to disrupt TGF $\beta$  signalling in tenocytes.  
470 All mice in this study also carried a transgenic tendon reporter ScxGFP (Pryce et al., 2007), and a  
471 Cre reporter Ai14 Rosa26-tdTomato (RosaT) (Madisen et al., 2010) for the lineage tracing of  
472 Scx-expressing cells. For embryo harvest, timed mating was set up in the afternoon, and  
473 identification of a mucosal plug on the next morning was considered 0.5 days of gestation  
474 (E0.5). Embryonic day 14.5 to postnatal day 13 (E14.5-P13) limb tendons were used for analysis.  
475 Mouse genotype was determined by PCR analysis of DNA extracted from tail snip using a lysis  
476 reagent (Viagen Biotech, Cat 102-T) and proteinase K digestion (55°C, overnight).

477

### 478 **Transmission electron microscopy (TEM)**

479 Skinned mouse forelimbs were fixed intact for several days in 1.5% glutaraldehyde/1.5%  
480 formaldehyde, rinsed, then decalcified in 0.2M EDTA with 50mM TRIS in a microwave (Ted  
481 Pella, Inc.) operated at 97.5 watts for fifteen 99 min cycles. Samples were fixed again in 1.5%  
482 glutaraldehyde/1.5% formaldehyde with 0.05% tannic acid overnight, then rinsed and post-  
483 fixed overnight in 1% OsO<sub>4</sub>. Samples were dehydrated and extensively infiltrated in Spurr's  
484 epoxy and polymerized at 70°C (Keene and Tufa, 2018). Ultrathin sections of tendons of

485 interest were cut at 80 nm, contrasted with uranyl acetate and lead citrate, and imaged using a  
486 FEI G20 TEM operated at 120 kV with montages collected using a AMT XR-41 2 x 2K camera.  
487 The acquired images were stitched using ImageJ software (<https://imagej.nih.gov/ij/>) (Preibisch  
488 et al., 2009). Three pups per time point were harvested for TEM analysis.

489

#### 490 **In situ hybridization and histological staining**

491 Dissected forelimbs were fixed with 4% paraformaldehyde in PBS, decalcified in 5 mM EDTA (1-  
492 2 weeks at 4°C) and incubated with a 5-30% sucrose/PBS gradient. The tissues were then  
493 embedded in OCT (Tissue-Tek, Inc), sectioned at 10-12 µm using a Microm HM550 cryostat  
494 (Thermo Scientific, Waltham, MA) and mounted on Superfrost plus slides (Fisher). In situ  
495 hybridization was performed as previously described (Murchison et al., 2007).

496 For immunofluorescence staining, sections were air-dried, rinsed thrice with PBS and  
497 blocked with 2% BSA and 2% normal goat serum in PBS for 1h at RT. The sections were then  
498 incubated overnight at 4°C with specific primary antibody as listed in Table S1. This was  
499 followed by incubation with the matching Cy3- or Cy5-conjugated secondary antibody (Jackson  
500 ImmunoResearch; diluted at 1:250 or 1:400) in PBS containing 2% normal goat serum for 1h at  
501 RT. DAPI (4',6-diamidino-2-phenylindole, dihydrochloride; Life Technologies) was used to  
502 counterstain cell nuclei. Immunolabelled sections were mounted in Fluorogel (Electron  
503 Microscopy Sciences, PA; Cat 17985-10) and visualized using a Zeiss ApoTome microscope. A  
504 washing step with PBS containing 0.1% Triton-X 100 was performed after the change of  
505 antibodies. Controls included omission of primary antibodies.

506 For examination of cell death and proliferation, TUNEL and EdU assays were performed  
507 using Click-iT EdU (Life Technologies) and In Situ Cell Death Detection (Roche) kits, respectively,  
508 following manufacturer's instructions. For all studies, sections from 2-4 pups were examined to  
509 ensure reproducibility of results.

510

#### 511 **Isolation and culture of tendon-derived stem/progenitor cells**

512 Mice at P7 were used for tendon progenitor cell isolation using a protocol modified from that  
513 in Mienaltowski et al (Mienaltowski et al., 2013). Briefly, both forelimbs and hindlimbs were

514 harvested from euthanized mice, skinned and exposed to 0.5% collagenase type I (Gibco, Cat  
515 17100-017) and 0.25% trypsin (Gibco, Cat 27250-018) in PBS for 15 min at 37°C with gentle  
516 shaking. The surfaces of tendons were then scraped carefully with a pair of forceps to remove  
517 epitenon/paratenon cells. The middle portion of tendons was then harvested, cut into small  
518 pieces and tendon cells were released by digestion for 30 min at 37°C with gentle shaking in a  
519 solution of 0.3% collagenase type I, 0.8% collagenase type II (Cat 17101-015), 0.5% trypsin and  
520 0.4% dispase II (Cat 17105-041) (all from Gibco). The released cells were strained with a 70- $\mu$ m  
521 cell strainer (BD Falcon, Cat 352350) and collected by centrifugation for 5 min at 300 g. The cells  
522 were then resuspended in PBS with 1% BSA, and fluorescence-activated cell sorting (FACS) was  
523 used to separate the cells for colony-forming assay.

524

#### 525 **Colony-forming unit (CFU) assay**

526 CFU assay was used to examine the self-renewal potential of cells (Bi et al., 2007). The  
527 enzymatically-released WT and heterozygous tenocytes as well as dedifferentiated mutant  
528 tendon cells (i.e. ScxGFP-negative and RosaT-positive cells) were sorted by FACS and plated at  
529 one cell per well in a 96-well plate using a BD Influx<sup>TM</sup> cell sorter (BD Bioscience, USA). About  
530 10-12 days into the culture, the colonies were fixed in 4% paraformaldehyde (10 min, RT),  
531 stained with 0.5% crystal violet for 30 min, and rinsed twice with water. Percentage of colony-  
532 forming unit was calculated as: Number of wells with colonies  $\div$  96  $\times$  100. Each data point  
533 represents the mean of duplicate plates from 3-5 separate experiments. Each experiment  
534 represents limb tendons collected from 2-4 pups.

535

#### 536 **Re-expression of Tgfbr2 in mutant cells using adeno-associated virus (AAV) vector**

537 FLAG or V5 epitope tag sequences were added at the C-terminus of the murine TGF $\beta$ R2  
538 Consensus Coding Sequence (CCDS23601). The Tgfbr2-FLAG (*Tgfbr2-FLAG*) and reverse-  
539 compliment Tgfbr2-V5 (*FLEX-Tgfbr2-V5*) insert sequences were synthesized and subcloned by  
540 GenScript into an AAV vector. The FLEX backbone vector (Atasoy et al., 2008) was purchased  
541 from AddGene and modified. Vectors were then packaged into AAV1 capsid, purified, and  
542 titered by the OHSU Molecular Virology Support Core. AAV insert expression was under the

543 control of a chicken beta-actin (CBA) promoter and an SV40 polyadenylation sequence. All  
544 experimental procedures were evaluated and approved by the institutional Animal Care and  
545 Ethics Committee.

546 Re-expression of Tgfb2 in embryos was done by delivery of AAV-FLEX-Tgfb2-V5, a Cre-  
547 dependent expression cassette, specifically to Tgfb2<sup>f/-</sup>;ScxCre mutant tendon cells.  
548 Transuterine microinjection of the viral vector into embryos was performed according to a  
549 published protocol (Jiang et al., 2013). Briefly, a laparotomy was performed on anesthetized  
550 pregnant females to expose the uterus. The left wrist field of the forelimb bud of each embryo  
551 was injected with ~2  $\mu$ l of concentrated viral inoculum ( $3.8 \times 10^{13}$  vg/ml) using a borosilicate  
552 glass capillary pipette (25-30  $\mu$ m outer diameter and 20 degree bevel). The abdominal and skin  
553 incisions were closed with resorbable sutures. The dams were recovered overnight with  
554 supplementary heating and then returned to main colony housing.

555 For postnatal re-expression of Tgfb2, ~10  $\mu$ l of AAV-Tgfb2-FLAG inoculum ( $4.1 \times 10^{12}$  vg/ml)  
556 was injected subcutaneously into the left forelimb of P1 pups using an 8 mm x 31G BD Ultra-  
557 Fine™ insulin syringe and needle (Becton Dickinson and Company, NJ, USA). For both  
558 experiments, forelimbs from P5 to P7 mutant pups (n = 3 pups for each stage) were harvested,  
559 fixed, cryosectioned and examined for expression of tendon differentiation markers in infected  
560 tendon cells.

561

### 562 **Single-cell RNA sequencing (scRNA-seq) and data analysis**

563 Tendons were collected and pooled from both forelimbs and hindlimbs as described above  
564 from two pups with the omission of tissue-scraping step. The enzymatically-released cells were  
565 centrifuged, resuspended in  $\alpha$ -MEM with 5% FBS and submitted to the OHSU Massively Parallel  
566 Sequencing Shared Resource (MPSSR) Core facility. scRNA-seq analysis was then performed  
567 using the 10x Genomics Chromium™ Single Cell 3' Reagent Kits and run on a Chromium™  
568 Controller followed by sequencing using the Illumina NextSeq® 500 Sequencing System (Mid  
569 Output), as per the manufacturer's instructions (10x Genomics Inc, CA; Illumina Inc, CA).

570 Sequencing data processing and downstream analysis were performed using Cell Ranger  
571 version 2.0 (10x Genomics, CA) (Zheng et al., 2017) with the default settings. Briefly, sequencing

572 reads were aligned to the mm10 genome and demultiplexed and filtered using total UMI count  
573 per cell to generate the gene barcode matrix. Principle component analysis was performed and  
574 the first ten principle components were used for the tSNE dimensional reduction and clustering  
575 analysis. Cells were clustered using K-means clustering. For each cluster, genes with an average  
576 UMI count  $\geq 0.5$ , fold change  $\geq 1.5$  and  $p$ -value  $\leq 0.05$  were identified as signature genes for  
577 each cluster. Gene Ontology (GO) enrichment analysis (clusterProfiler) (Yu et al., 2012) and  
578 the PANTHER Classification System (<http://pantherdb.org/>) were used to elucidate the  
579 biological process and signaling pathway associated with individual gene. Enriched canonical  
580 pathways were defined as significant if adjusted  $p$ -values were  $< 0.05$ .

581

### 582 **Statistical analysis**

583 Unless stated otherwise, all graphs are presented as mean  $\pm$  standard deviation (SD). Student's  
584 t-tests were performed to determine the statistical significance of differences between groups  
585 ( $n \geq 3$ ). A value of  $p < 0.05$  is regarded as statistically significant.

586

### 587 **Acknowledgements**

588 The authors thank Dr Elazar Zelzer (Department of Molecular Genetics, Weizmann Institute of  
589 Science, Israel) for critical reading of the manuscript. We are grateful to staff from MPSSR and  
590 FACS core facilities, OHSU particularly Dr Robert Searles, Mrs Amy Carlos and Dr Miranda  
591 Gilchrist for their excellent technical assistance. This work was funded by NIH (R01AR055973,  
592 RS; R01DC014160, JVB) and Shriners Hospitals for Children (SHC 5410-POR-14). G.K.T was  
593 supported by Research Fellowship from Shriners Hospital for Children.

594

### 595 **Competing interests**

596 The authors declare no competing interests.

597

598

599

## 600 **References**

- 601 Atasoy, D., Aponte, Y., Su, H. H. and Sternson, S. M. (2008) 'A FLEX switch targets  
602 Channelrhodopsin-2 to multiple cell types for imaging and long-range circuit mapping', *The*  
603 *Journal of neuroscience : the official journal of the Society for Neuroscience* 28(28): 7025-30.
- 604 Bauge, C., Duval, E., Ollitrault, D., Girard, N., Leclercq, S., Galera, P. and Boumediene, K. (2013)  
605 'Type II TGFbeta receptor modulates chondrocyte phenotype', *Age* 35(4): 1105-16.
- 606 Bi, Y., Ehirchiou, D., Kilts, T. M., Inkson, C. A., Embree, M. C., Sonoyama, W., Li, L., Leet, A. I., Seo,  
607 B. M., Zhang, L. et al. (2007) 'Identification of tendon stem/progenitor cells and the role of the  
608 extracellular matrix in their niche', *Nature medicine* 13(10): 1219-27.
- 609 Blitz, E., Sharir, A., Akiyama, H. and Zelzer, E. (2013) 'Tendon-bone attachment unit is formed  
610 modularly by a distinct pool of Scx- and Sox9-positive progenitors', *Development* 140(13): 2680-  
611 90.
- 612 Cadby, J. A., Buehler, E., Godbout, C., van Weeren, P. R. and Snedeker, J. G. (2014) 'Differences  
613 between the cell populations from the peritenon and the tendon core with regard to their  
614 potential implication in tendon repair', *PLoS One* 9(3): e92474.
- 615 Cai, S., Fu, X. and Sheng, Z. (2007) 'Dedifferentiation: A New Approach in Stem Cell Research',  
616 *BioScience* 57(8): 655-662.
- 617 Cammareri, P., Vincent, D. F., Hodder, M. C., Ridgway, R. A., Murgia, C., Nobis, M., Campbell, A.  
618 D., Varga, J., Huels, D. J., Subramani, C. et al. (2017) 'TGFbeta pathway limits dedifferentiation  
619 following WNT and MAPK pathway activation to suppress intestinal tumourigenesis', *Cell death*  
620 *and differentiation* 24(10): 1681-1693.
- 621 Chytil, A., Magnuson, M. A., Wright, C. V. and Moses, H. L. (2002) 'Conditional inactivation of  
622 the TGF-beta type II receptor using Cre:Lox', *Genesis* 32(2): 73-5.
- 623 Dakin, S. G., Martinez, F. O., Yapp, C., Wells, G., Oppermann, U., Dean, B. J., Smith, R. D.,  
624 Wheway, K., Watkins, B., Roche, L. et al. (2015) 'Inflammation activation and resolution in  
625 human tendon disease', *Science translational medicine* 7(311): 311ra173.
- 626 Dymant, N. A., Liu, C. F., Kazemi, N., Aschbacher-Smith, L. E., Kenter, K., Breidenbach, A. P.,  
627 Shearn, J. T., Wylie, C., Rowe, D. W. and Butler, D. L. (2013) 'The paratenon contributes to  
628 scleraxis-expressing cells during patellar tendon healing', *PLoS One* 8(3): e59944.
- 629 Goessling, W., North, T. E., Loewer, S., Lord, A. M., Lee, S., Stoick-Cooper, C. L., Weidinger, G.,  
630 Puder, M., Daley, G. Q., Moon, R. T. et al. (2009) 'Genetic interaction of PGE2 and Wnt signaling  
631 regulates developmental specification of stem cells and regeneration', *Cell* 136(6): 1136-47.
- 632 Gournay, J., Auvigne, I., Pichard, V., Ligeza, C., Bralet, M. P. and Ferry, N. (2002) 'In vivo cell  
633 lineage analysis during chemical hepatocarcinogenesis in rats using retroviral-mediated gene  
634 transfer: evidence for dedifferentiation of mature hepatocytes', *Laboratory investigation; a*  
635 *journal of technical methods and pathology* 82(6): 781-8.
- 636 Guo, R., Xu, X., Lu, Y. and Xie, X. (2017) 'Physiological oxygen tension reduces hepatocyte  
637 dedifferentiation in in vitro culture', *Scientific reports* 7(1): 5923.

- 638 Havis, E., Bonnin, M. A., Esteves de Lima, J., Charvet, B., Milet, C. and Duprez, D. (2016)  
639 'TGFbeta and FGF promote tendon progenitor fate and act downstream of muscle contraction  
640 to regulate tendon differentiation during chick limb development', *Development* 143(20): 3839-  
641 3851.
- 642 Havis, E., Bonnin, M. A., Olivera-Martinez, I., Nazaret, N., Ruggiu, M., Weibel, J., Durand, C.,  
643 Guerquin, M. J., Bonod-Bidaud, C., Ruggiero, F. et al. (2014) 'Transcriptomic analysis of mouse  
644 limb tendon cells during development', *Development* 141(19): 3683-96.
- 645 Hess, J., Angel, P. and Schorpp-Kistner, M. (2004) 'AP-1 subunits: quarrel and harmony among  
646 siblings', *Journal of cell science* 117(Pt 25): 5965-73.
- 647 Hittinger, M., Czyz, Z. T., Huesemann, Y., Maneck, M., Botteron, C., Kaeufl, S., Klein, C. A. and  
648 Polzer, B. (2013) 'Molecular profiling of single Sca-1+/CD34+,- cells--the putative murine lung  
649 stem cells', *PLoS One* 8(12): e83917.
- 650 Holmes, C. and Stanford, W. L. (2007) 'Concise review: stem cell antigen-1: expression, function,  
651 and enigma', *Stem cells* 25(6): 1339-47.
- 652 Howell, K., Chien, C., Bell, R., Laudier, D., Tufa, S. F., Keene, D. R., Andarawis-Puri, N. and Huang,  
653 A. H. (2017) 'Novel Model of Tendon Regeneration Reveals Distinct Cell Mechanisms Underlying  
654 Regenerative and Fibrotic Tendon Healing', *Scientific reports* 7: 45238.
- 655 Huang, A. H., Lu, H. H. and Schweitzer, R. (2015) 'Molecular regulation of tendon cell fate during  
656 development', *Journal of orthopaedic research : official publication of the Orthopaedic Research*  
657 *Society* 33(6): 800-12.
- 658 Huang, A. H., Riordan, T. J., Wang, L., Eyal, S., Zelzer, E., Brigande, J. V. and Schweitzer, R. (2013)  
659 'Repositioning forelimb superficialis muscles: tendon attachment and muscle activity enable  
660 active relocation of functional myofibers', *Developmental Cell* 26(5): 544-51.
- 661 Ito, Y., Toriuchi, N., Yoshitaka, T., Ueno-Kudoh, H., Sato, T., Yokoyama, S., Nishida, K., Akimoto,  
662 T., Takahashi, M., Miyaki, S. et al. (2010) 'The Mohawk homeobox gene is a critical regulator of  
663 tendon differentiation', *Proceedings of the National Academy of Sciences of the United States of*  
664 *America* 107(23): 10538-42.
- 665 James, A. W. (2013) 'Review of Signaling Pathways Governing MSC Osteogenic and Adipogenic  
666 Differentiation', *Scientifica* 2013: 684736.
- 667 Jiang, H., Wang, L., Beier, K. T., Cepko, C. L., Fekete, D. M. and Brigande, J. V. (2013) 'Lineage  
668 analysis of the late otocyst stage mouse inner ear by transuterine microinjection of a retroviral  
669 vector encoding alkaline phosphatase and an oligonucleotide library', *PLoS One* 8(7): e69314.
- 670 Kannus, P. (2000) 'Structure of the tendon connective tissue', *Scandinavian journal of medicine*  
671 *& science in sports* 10(6): 312-20.
- 672 Keene, D. R. and Tufa, S. F. (2018) 'Ultrastructural analysis of the extracellular matrix', *Methods*  
673 *in cell biology* 143: 1-39.

- 674 Kuo, C. K., Petersen, B. C. and Tuan, R. S. (2008) 'Spatiotemporal protein distribution of TGF-  
675 betas, their receptors, and extracellular matrix molecules during embryonic tendon  
676 development', *Dev Dyn* 237(5): 1477-89.
- 677 Ladewig, J., Koch, P. and Brustle, O. (2013) 'Leveling Waddington: the emergence of direct  
678 programming and the loss of cell fate hierarchies', *Nature reviews. Molecular cell biology* 14(4):  
679 225-36.
- 680 Li, W., Jiang, K. and Ding, S. (2012) 'Concise review: A chemical approach to control cell fate and  
681 function', *Stem cells* 30(1): 61-8.
- 682 Madisen, L., Zwingman, T. A., Sunkin, S. M., Oh, S. W., Zariwala, H. A., Gu, H., Ng, L. L., Palmiter,  
683 R. D., Hawrylycz, M. J., Jones, A. R. et al. (2010) 'A robust and high-throughput Cre reporting  
684 and characterization system for the whole mouse brain', *Nature neuroscience* 13(1): 133-40.
- 685 Maeda, T., Sakabe, T., Sunaga, A., Sakai, K., Rivera, A. L., Keene, D. R., Sasaki, T., Stavnezer, E.,  
686 Iannotti, J., Schweitzer, R. et al. (2011) 'Conversion of mechanical force into TGF-beta-mediated  
687 biochemical signals', *Current biology : CB* 21(11): 933-41.
- 688 McCusker, C., Bryant, S. V. and Gardiner, D. M. (2015) 'The axolotl limb blastema: cellular and  
689 molecular mechanisms driving blastema formation and limb regeneration in tetrapods',  
690 *Regeneration* 2(2): 54-71.
- 691 Mendias, C. L., Gumucio, J. P., Bakhurin, K. I., Lynch, E. B. and Brooks, S. V. (2012) 'Physiological  
692 loading of tendons induces scleraxis expression in epitenon fibroblasts', *Journal of orthopaedic  
693 research : official publication of the Orthopaedic Research Society* 30(4): 606-12.
- 694 Mienaltowski, M. J., Adams, S. M. and Birk, D. E. (2013) 'Regional differences in stem  
695 cell/progenitor cell populations from the mouse achilles tendon', *Tissue engineering. Part A*  
696 19(1-2): 199-210.
- 697 Mu, X., Peng, H., Pan, H., Huard, J. and Li, Y. (2011) 'Study of muscle cell dedifferentiation after  
698 skeletal muscle injury of mice with a Cre-Lox system', *PLoS One* 6(2): e16699.
- 699 Mueller, A. J., Tew, S. R., Vasieva, O., Clegg, P. D. and Canty-Laird, E. G. (2016) 'A systems  
700 biology approach to defining regulatory mechanisms for cartilage and tendon cell phenotypes',  
701 *Scientific reports* 6: 33956.
- 702 Nordmann, T. M., Dror, E., Schulze, F., Traub, S., Berishvili, E., Barbieux, C., Boni-Schnetzler, M.  
703 and Donath, M. Y. (2017) 'The Role of Inflammation in beta-cell Dedifferentiation', *Scientific  
704 reports* 7(1): 6285.
- 705 Norton, J. D. (2000) 'ID helix-loop-helix proteins in cell growth, differentiation and  
706 tumorigenesis', *Journal of cell science* 113 ( Pt 22): 3897-905.
- 707 Nusse, Y. M., Savage, A. K., Marangoni, P., Rosendahl-Huber, A. K. M., Landman, T. A., de  
708 Sauvage, F. J., Locksley, R. M. and Klein, O. D. (2018) 'Parasitic helminths induce fetal-like  
709 reversion in the intestinal stem cell niche', *Nature* 559(7712): 109-113.



- 710 Pennock, R., Bray, E., Pryor, P., James, S., McKeegan, P., Sturmey, R. and Genever, P. (2015)  
711 'Human cell dedifferentiation in mesenchymal condensates through controlled autophagy',  
712 *Scientific reports* 5: 13113.
- 713 Perekatt, A. O., Shah, P. P., Cheung, S., Jariwala, N., Wu, A., Gandhi, V., Kumar, N., Feng, Q.,  
714 Patel, N., Chen, L. et al. (2018) 'SMAD4 Suppresses WNT-Driven Dedifferentiation and  
715 Oncogenesis in the Differentiated Gut Epithelium', *Cancer research* 78(17): 4878-4890.
- 716 Poss, K. D., Wilson, L. G. and Keating, M. T. (2002) 'Heart regeneration in zebrafish', *Science*  
717 298(5601): 2188-90.
- 718 Preibisch, S., Saalfeld, S. and Tomancak, P. (2009) 'Globally optimal stitching of tiled 3D  
719 microscopic image acquisitions', *Bioinformatics* 25(11): 1463-5.
- 720 Pryce, B. A., Brent, A. E., Murchison, N. D., Tabin, C. J. and Schweitzer, R. (2007) 'Generation of  
721 transgenic tendon reporters, ScxGFP and ScxAP, using regulatory elements of the scleraxis  
722 gene', *Dev Dyn* 236(6): 1677-82.
- 723 Pryce, B. A., Watson, S. S., Murchison, N. D., Staverosky, J. A., Dunker, N. and Schweitzer, R.  
724 (2009) 'Recruitment and maintenance of tendon progenitors by TGFbeta signaling are essential  
725 for tendon formation', *Development* 136(8): 1351-61.
- 726 Rui, Y. F., Lui, P. P., Li, G., Fu, S. C., Lee, Y. W. and Chan, K. M. (2010) 'Isolation and  
727 characterization of multipotent rat tendon-derived stem cells', *Tissue engineering. Part A* 16(5):  
728 1549-58.
- 729 Runesson, E., Ackermann, P., Karlsson, J. and Eriksson, B. I. (2015) 'Nucleostemin- and Oct 3/4-  
730 positive stem/progenitor cells exhibit disparate anatomical and temporal expression during rat  
731 Achilles tendon healing', *BMC musculoskeletal disorders* 16: 212.
- 732 Sadagurski, M., Yakar, S., Weingarten, G., Holzenberger, M., Rhodes, C. J., Breikreutz, D.,  
733 Leroith, D. and Wertheimer, E. (2006) 'Insulin-like growth factor 1 receptor signaling regulates  
734 skin development and inhibits skin keratinocyte differentiation', *Molecular and cellular biology*  
735 26(7): 2675-87.
- 736 Sakabe, T., Sakai, K., Maeda, T., Sunaga, A., Furuta, N., Schweitzer, R., Sasaki, T. and Sakai, T.  
737 (2018) 'Transcription factor scleraxis vitally contributes to progenitor lineage direction in wound  
738 healing of adult tendon in mice', *The Journal of biological chemistry* 293(16): 5766-5780.
- 739 Sakaki-Yumoto, M., Katsuno, Y. and Derynck, R. (2013) 'TGF-beta family signaling in stem cells',  
740 *Biochimica et biophysica acta* 1830(2): 2280-96.
- 741 Salazar, V. S., Ohte, S., Capelo, L. P., Gamer, L. and Rosen, V. (2016) 'Specification of osteoblast  
742 cell fate by canonical Wnt signaling requires Bmp2', *Development* 143(23): 4352-4367.
- 743 Santibanez, J. F., Quintanilla, M. and Bernabeu, C. (2011) 'TGF-beta/TGF-beta receptor system  
744 and its role in physiological and pathological conditions', *Clinical science* 121(6): 233-51.
- 745 Schoenenberger, A. D., Foolen, J., Moor, P., Silvan, U. and Snedeker, J. G. (2018) 'Substrate fiber  
746 alignment mediates tendon cell response to inflammatory signaling', *Acta biomaterialia* 71:  
747 306-317.

- 748 Schweitzer, R., Chyung, J. H., Murtaugh, L. C., Brent, A. E., Rosen, V., Olson, E. N., Lassar, A. and  
749 Tabin, C. J. (2001) 'Analysis of the tendon cell fate using Scleraxis, a specific marker for tendons  
750 and ligaments', *Development* 128(19): 3855-66.
- 751 Sidney, L. E., Branch, M. J., Dunphy, S. E., Dua, H. S. and Hopkinson, A. (2014) 'Concise review:  
752 evidence for CD34 as a common marker for diverse progenitors', *Stem cells* 32(6): 1380-9.
- 753 Stewart, C. E. and Rotwein, P. (1996) 'Growth, differentiation, and survival: multiple  
754 physiological functions for insulin-like growth factors', *Physiological reviews* 76(4): 1005-26.
- 755 Stocum, D. L. (2017) 'Mechanisms of urodele limb regeneration', *Regeneration* 4(4): 159-200.
- 756 Stolk, M., Klatter-Schulz, F., Schmock, A., Minkwitz, S., Wildemann, B. and Seifert, M. (2017)  
757 'New insights into tenocyte-immune cell interplay in an in vitro model of inflammation',  
758 *Scientific reports* 7(1): 9801.
- 759 Sun, X., Fu, X., Han, W., Zhao, Y., Liu, H. and Sheng, Z. (2011) 'Dedifferentiation of human  
760 terminally differentiating keratinocytes into their precursor cells induced by basic fibroblast  
761 growth factor', *Biological & pharmaceutical bulletin* 34(7): 1037-45.
- 762 Sung, J. H., Yang, H. M., Park, J. B., Choi, G. S., Joh, J. W., Kwon, C. H., Chun, J. M., Lee, S. K. and  
763 Kim, S. J. (2008) 'Isolation and characterization of mouse mesenchymal stem cells',  
764 *Transplantation proceedings* 40(8): 2649-54.
- 765 Takahashi, K. and Yamanaka, S. (2006) 'Induction of pluripotent stem cells from mouse  
766 embryonic and adult fibroblast cultures by defined factors', *Cell* 126(4): 663-76.
- 767 Talchai, C., Xuan, S., Lin, H. V., Sussel, L. and Accili, D. (2012) 'Pancreatic beta cell  
768 dedifferentiation as a mechanism of diabetic beta cell failure', *Cell* 150(6): 1223-34.
- 769 Tan, Q., Lui, P. P. and Lee, Y. W. (2013) 'In vivo identity of tendon stem cells and the roles of  
770 stem cells in tendon healing', *Stem cells and development* 22(23): 3128-40.
- 771 Tata, P. R., Mou, H., Pardo-Saganta, A., Zhao, R., Prabhu, M., Law, B. M., Vinarsky, V., Cho, J. L.,  
772 Breton, S., Sahay, A. et al. (2013) 'Dedifferentiation of committed epithelial cells into stem cells  
773 in vivo', *Nature* 503(7475): 218-23.
- 774 Vander Ark, A., Cao, J. and Li, X. (2018) 'TGF-beta receptors: In and beyond TGF-beta signaling',  
775 *Cellular signalling* 52: 112-120.
- 776 Weber, A., Huesken, C., Bergmann, E., Kiess, W., Christiansen, N. M. and Christiansen, H. (2003)  
777 'Coexpression of insulin receptor-related receptor and insulin-like growth factor 1 receptor  
778 correlates with enhanced apoptosis and dedifferentiation in human neuroblastomas', *Clinical  
779 cancer research : an official journal of the American Association for Cancer Research* 9(15):  
780 5683-92.
- 781 Weinberg, N., Ouziel-Yahalom, L., Knoller, S., Efrat, S. and Dor, Y. (2007) 'Lineage tracing  
782 evidence for in vitro dedifferentiation but rare proliferation of mouse pancreatic beta-cells',  
783 *Diabetes* 56(5): 1299-304.
- 784 Wolfman, N. M., Hattersley, G., Cox, K., Celeste, A. J., Nelson, R., Yamaji, N., Dube, J. L., DiBlasio-  
785 Smith, E., Nove, J., Song, J. J. et al. (1997) 'Ectopic induction of tendon and ligament in rats by

786 growth and differentiation factors 5, 6, and 7, members of the TGF-beta gene family', *J Clin*  
787 *Invest* 100(2): 321-30.

788 Yin, Z., Hu, J. J., Yang, L., Zheng, Z. F., An, C. R., Wu, B. B., Zhang, C., Shen, W. L., Liu, H. H., Chen,  
789 J. L. et al. (2016) 'Single-cell analysis reveals a nestin(+) tendon stem/progenitor cell population  
790 with strong tenogenic potentiality', *Science advances* 2(11): e1600874.

791 Yu, G., Wang, L. G., Han, Y. and He, Q. Y. (2012) 'clusterProfiler: an R package for comparing  
792 biological themes among gene clusters', *Omics : a journal of integrative biology* 16(5): 284-7.

793 Zhang, C., Chen, P., Fei, Y., Liu, B., Ma, K., Fu, X., Zhao, Z., Sun, T. and Sheng, Z. (2012)  
794 'Wnt/beta-catenin signaling is critical for dedifferentiation of aged epidermal cells in vivo and in  
795 vitro', *Aging cell* 11(1): 14-23.

796 Zhang, J. and Wang, J. H. (2010) 'Characterization of differential properties of rabbit tendon  
797 stem cells and tenocytes', *BMC musculoskeletal disorders* 11: 10.

798 Zhang, Y., Gago-Lopez, N., Li, N., Zhang, Z., Alver, N., Liu, Y., Martinson, A. M., Mehri, A. and  
799 MacLellan, W. R. (2019) 'Single-cell imaging and transcriptomic analyses of endogenous  
800 cardiomyocyte dedifferentiation and cycling', *Cell discovery* 5: 30.

801 Zhang, Y., Li, T. S., Lee, S. T., Wawrowsky, K. A., Cheng, K., Galang, G., Malliaras, K., Abraham, M.  
802 R., Wang, C. and Marban, E. (2010) 'Dedifferentiation and proliferation of mammalian  
803 cardiomyocytes', *PLoS One* 5(9): e12559.

804 Zheng, G. X., Terry, J. M., Belgrader, P., Ryvkin, P., Bent, Z. W., Wilson, R., Ziraldo, S. B., Wheeler,  
805 T. D., McDermott, G. P., Zhu, J. et al. (2017) 'Massively parallel digital transcriptional profiling of  
806 single cells', *Nature communications* 8: 14049.

807

808

809

810

811

812

813

814

815

816

817

818

819

820



847 **Fig 1. Tendon phenotypes manifested in *Tgfr2;ScxCre* mutants.** (A-D) Whole-mount imaging  
848 in fluorescent ScxGFP signal or brightfield. (A) Dorsally-viewed embryo forelimb shows the  
849 formation of a complete network of tendons in both mutant and heterozygous control by E14.5.  
850 (B) Tendons of mutant pups appeared intact at birth, but by P3 lateral tendons disintegrated  
851 and were eventually eliminated (yellow arrowheads), whereas the majority of other tendons  
852 persisted with a substantial loss of the ScxGFP signal (white arrowheads). (C) Mutant pups  
853 appeared normal at birth but showed physical abnormalities including abducted paw and  
854 splayed limb (black arrowheads) by P3. (D-E) Substantial loss of ScxGFP signal was also detected  
855 in all tendons and related tissues. (D) Tail tendons and annulus fibrosus of the intervertebral  
856 disc (white arrowheads) in P7 pups. (E) Collateral ligaments of the metacarpophalangeal joint  
857 imaged in transverse section through the joints of heterozygous control and mutant pups at P7  
858 (white arrowhead). Scale bar, 100  $\mu$ m. Mutant: CKO, Heterozygous: Het.  
859

860  
861  
862  
863  
864  
865  
866  
867  
868  
869  
870  
871  
872  
873  
874  
875  
876  
877  
878  
879  
880  
881  
882  
883  
884  
885  
886  
887  
888  
889  
890  
891  
892  
893



**Fig 2. Tendon development in *Tgfbfr2*;*ScxCre* mutant embryos was not perturbed through embryogenesis.** (A) ScxGFP signal and (B) tenomodulin (Tnmd) immunofluorescence on transverse sections at wrist level of E16.5 mutant embryos demonstrate that the pattern and expression of prototypic tenocyte markers was not disrupted in mutant tendons. (C) Tnmd immunofluorescence in E16.5 wild-type tenocytes. (A'), (B') and (C') are higher magnifications of extensor digitorius communis tendons as boxed in (A), (B) and (C). (D) In situ hybridization for *Col1a1* on transverse sections of the forelimb from E15.5 mutant and wild-type littermates reveals that expression of the major matrix genes was not altered in mutant embryos (black arrowhead). (E,F) TEM images of tendons from forelimbs of E18.5 mutant and wild-type embryos reveals that organization and accumulation of the tendon extracellular matrix was not disrupted in the mutant. (E',F') Higher magnification views of (E) and (F) for direct visualization of the collagen fibers. Scale bars, 200  $\mu\text{m}$  (A-C) and 20  $\mu\text{m}$  (A'-C'). Mutant: CKO, Wild-type: WT.

894  
895  
896  
897  
898  
899  
900  
901  
902  
903  
904  
905  
906  
907  
908  
909  
910  
911  
912  
913  
914  
915  
916  
917  
918  
919  
920  
921  
922  
923  
924  
925  
926  
927  
928  
929  
930  
931  
932



**Fig 3. Tendon degeneration observed in *Tgfr2;ScxCre* mutants at later postnatal stages.** TEM images of tendons from forelimbs of mutant and wild-type littermates at P0, P3 and P13. Images were taken at high magnification for direct examination of structural details. Insets show transverse section TEM images of entire tendons at low-magnification (not to scale). Despite detectable functional defects starting around P3 in mutant pups, collagen matrix organization in mutant neonates was indistinguishable from that of their wild-type littermates. Apparent collagen degradation and disrupted epitenon structures (white arrowhead) were detected only in older mutant pups as shown here for P13 pups. Black arrowhead indicates epitenon in wild-type pups. Mutant: CKO, Wild-type: WT.

933  
934  
935  
936  
937  
938  
939  
940  
941  
942  
943  
944  
945  
946  
947  
948  
949  
950  
951  
952  
953  
954  
955  
956  
957  
958  
959  
960  
961  
962  
963  
964  
965  
966  
967  
968  
969  
970  
971



**Fig 4. Deletion of *Tgfbr2* in *Scx*-expressing cells (*Tgfbr2*;*Scx*Cre) results in loss of tenocyte differentiation markers.** (A-D) Transverse sections of extensor digitorum communis tendons of wild-type and mutant pups at wrist level. (A) In P7 wild-type pups, all tenocytes were positive for tendon reporter *ScxGFP* signal. (B) Conversely, most cells in P7 mutant tendons lost the *ScxGFP* signal (white arrowhead) whereas the cells positive for *ScxGFP* signal are newly recruited cells (yellow arrowhead; Tan et al, manuscript in preparation). (C) In situ hybridization shows that the mutant cells also lost gene expression of tendon markers *Col1a1* and *Tnmd* (images not to scale). (D) Lineage tracing using *Scx*Cre shows that all *ScxGFP*-negative cells in (B) were positive for the Cre reporter *Rosa26*-tdTomato (*RosaT*; white arrowhead), proving that the *ScxGFP*-negative cells in mutant tendons were derived from the embryonic tenocytes. Dashed lines demarcate the mutant tendons. Scale bar, 20  $\mu$ m. Mutant: CKO, Wild-type: WT.



**Fig 5. *Tgfr2;ScxCre* mutant tenocytes acquired stem/progenitor features.** (A) The colony-forming efficiency of P7 wild-type and heterozygous tenocytes as well as mutant tendon cells were evaluated by seeding one cell per well of the FACS-sorted cells in 96 well plates, and colonies formed were visualized with crystal violet staining. Mutant tenocytes exhibited significantly higher clonogenic capacity compared to wild-type and heterozygous controls. The results shown are mean  $\pm$  SD ( $n=5-6$ ,  $**p<0.01$ ). (B) Immunofluorescence staining for stem/progenitor markers in transverse sections of mutant tendons shows that mutant tendon cells acquired in postnatal stages expression of stem cell antigen-1 (Sca-1) and CD44. (C) In wild-type littermate controls, expression of both markers was detected in epitenon (white arrowhead), but not in tenocytes. Dashed line demarcates the mutant tendon. Scale bars, 10  $\mu$ m. Mutant: CKO, Wild-type: WT, Heterozygous: Het.





1032 **Fig 6. Molecular profile of the dedifferentiated mutant tenocytes.** (A) Upregulated expression  
1033 of *CD34* gene in P7 mutant tenocytes as revealed by scRNA-Seq analysis (see also Table 2) was  
1034 determined using immunostaining. Transverse section of forelimb tendons shows that CD34  
1035 was indeed expressed by mutant tenocytes, while in wild-type controls CD34 was detected only  
1036 in epitenon cells (white arrowhead). Dashed line demarcates the mutant tendon. (B,C) Gene  
1037 ontology (GO) enrichment analysis in terms of biological processes associated with the (B)  
1038 upregulated and (C) downregulated genes in P7 mutant compared with wild-type tenocytes.  
1039 Selected GO terms are included in this figure, and genes annotated to the GO terms are  
1040 available in Table S3. Scale bar, 10  $\mu$ m. Mutant: CKO, Wild-type: WT.

1041  
1042  
1043  
1044  
1045  
1046  
1047  
1048  
1049  
1050

1051  
1052  
1053  
1054  
1055  
1056  
1057  
1058  
1059  
1060  
1061  
1062  
1063  
1064  
1065  
1066  
1067  
1068  
1069  
1070  
1071  
1072  
1073  
1074  
1075  
1076  
1077  
1078  
1079  
1080  
1081  
1082

### A FLEX-Tgfr2-V5 cassette



### B P6 CKO (AAV infection at E16.5)



### C P6 WT



### D Percentage of AAV-infected CKO tendon cells that are positive for tendon markers



| Injection stage | Total counted infected cells |
|-----------------|------------------------------|
| E12.5           | 82                           |
| E16.5           | 40                           |
| P1              | 315                          |

**Fig 7. Tenocyte dedifferentiation is dependent on cell autonomous loss of TGFβ signaling.** (A) AAV1-FLEX-Tgfr2-V5 virus contains the reverse-complement sequence of Tgfr2 with a C-terminal V5 epitope tag. Cre activity will lead to a permanent inversion of the cassette that will then express the V5-tagged TGFβ type II receptor. (B) Targeted expression of TGFβ type II receptor in E16.5 mutant tendon cells using the AAV1-FLEX-Tgfr2-V5 prevented the loss of tendon markers in the infected tenocytes. The forelimb of E16.5 mutant embryos was infected with AAV1-FLEX-Tgfr2-V5 virus and harvested at P6. Transverse forelimb sections were stained

1090 with antibodies for V5 (red) to detect AAV-infected cells and tenomodulin (Tnmd; yellow), a  
1091 prototypic tendon marker expressed by (C) all tenocytes in the wild-type tendon at this stage.  
1092 Dashed line demarcates the mutant tendon. (D) Quantification shows that about 95-98% of the  
1093 AAV-infected (V5-positive) mutant tendon cells retained or re-expressed tendon differentiation  
1094 markers after viral injection at different developmental stages (n = 3 pups for each stage). Scale  
1095 bar, 10  $\mu$ m. Mutant: CKO, Wild-type: WT.

1096  
1097  
1098  
1099  
1100  
1101  
1102  
1103  
1104  
1105  
1106  
1107  
1108  
1109  
1110  
1111  
1112  
1113  
1114  
1115  
1116  
1117  
1118  
1119  
1120  
1121  
1122  
1123  
1124  
1125  
1126  
1127  
1128  
1129  
1130

1131  
1132  
1133  
1134  
1135  
1136  
1137  
1138  
1139  
1140  
1141  
1142  
1143  
1144  
1145  
1146  
1147  
1148  
1149  
1150  
1151  
1152  
1153  
1154  
1155  
1156  
1157  
1158  
1159  
1160  
1161  
1162  
1163  
1164  
1165  
1166  
1167  
1168  
1169  
1170



**Fig 8. Proposed roles of TGF $\beta$  signaling in the maintenance of tendon cell fate.** Targeted disruption of the TGF $\beta$  type II receptor by ScxCre resulted in tenocyte dedifferentiation in early postnatal stages. Tenocyte dedifferentiation was reversed by reactivation of TGF $\beta$  signaling in individual mutant cells, demonstrating a cell autonomous role for TGF $\beta$  signaling for maintenance of the cell fate. Conversely, direct loss of the TGF $\beta$  type II receptor using Cre drivers with different spatio-temporal features was not sufficient to cause tenocyte dedifferentiation, suggesting that mere loss of TGF $\beta$  signaling by tendon cells was not sufficient to cause dedifferentiation. We therefore propose that maintenance of the tendon cell fate is dependent on a combination of a cell autonomous function of TGF $\beta$  signaling and an additional, likely non cell-autonomous factor, e.g. the microenvironment of the tendon in the Tgfbfr2;ScxCre mutant.

1171 **Table 1. Top 25 downregulated genes (2-fold change, adjusted  $p < 0.05$ ) in P7 mutant cells**  
 1172 **compared with P7 wild-type tenocytes.** See also Table S2 for a complete list of the  
 1173 downregulated genes.

1174

| Gene symbol          | Gene name                                                                                      | Fold change |
|----------------------|------------------------------------------------------------------------------------------------|-------------|
| Wif1                 | Wnt inhibitory factor 1                                                                        | 157.4       |
| Col11a2 <sup>#</sup> | Collagen, type XI, alpha 2                                                                     | 92.0        |
| Scx <sup>#</sup>     | Scleraxis                                                                                      | 66.2        |
| Col2a1 <sup>δ</sup>  | Collagen, type II, alpha 1                                                                     | 58.9        |
| Car9                 | Carbonic anhydrase 9                                                                           | 58.1        |
| Sema3b               | Sema domain, immunoglobulin domain (Ig), short basic domain, secreted, (semaphorin) 3B         | 43.9        |
| Cgref1               | Cell growth regulator with EF hand domain 1                                                    | 33.2        |
| Fmod <sup>#</sup>    | Fibromodulin                                                                                   | 27.9        |
| Cilp2                | Cartilage intermediate layer protein 2                                                         | 24.7        |
| Matn4                | Matrilin 4                                                                                     | 19.3        |
| P4ha1 <sup>δ</sup>   | Procollagen-proline, 2-oxoglutarate 4-dioxygenase (proline 4-hydroxylase), alpha 1 polypeptide | 13.5        |
| Pcolce2 <sup>δ</sup> | Procollagen C-endopeptidase enhancer 2                                                         | 11.8        |
| Tpm1                 | Tropomyosin 1, alpha                                                                           | 10.0        |
| Wisp1                | WNT1 inducible signaling pathway protein 1                                                     | 9.7         |
| Tnmd <sup>#</sup>    | Tenomodulin                                                                                    | 8.5         |
| Loxl2 <sup>δ</sup>   | Lysyl oxidase-like 2                                                                           | 8.3         |
| 1500015O10Rik        | RIKEN cDNA 1500015O10 gene                                                                     | 7.1         |
| Col11a1 <sup>#</sup> | Collagen, type XI, alpha 1                                                                     | 7.1         |
| Pdgfrl <sup>δ</sup>  | Platelet-derived growth factor receptor-like                                                   | 7.0         |
| Mfap4                | Microfibrillar-associated protein 4                                                            | 6.5         |
| Col1a1 <sup>#</sup>  | Collagen, type I, alpha 1                                                                      | 6.4         |
| Ptgis                | Prostaglandin I2 (prostacyclin) synthase                                                       | 6.4         |
| Col1a2 <sup>#</sup>  | Collagen, type I, alpha 2                                                                      | 6.2         |
| Itgbl1               | Integrin, beta-like 1                                                                          | 5.7         |
| Tpm2                 | Tropomyosin 2, beta                                                                            | 5.4         |

1175 Note:

1176 1) <sup>#</sup>=Tendon differentiation or specific marker; <sup>δ</sup>=genes related to tendons.

1177 2) Note that the expression level detected for Scx also included that of ScxGFP, and therefore do not reflect the  
 1178 expression level of endogenous Scx.

1179

1180

1181

1182

1183

1184

1185

1186

1187

1188 **Table 2. Top 25 upregulated genes (2-fold change, adjusted  $p < 0.05$ ) in P7 mutant cells**  
 1189 **compared with P7 wild-type tenocytes.** See also Table S2 for a complete list of the  
 1190 downregulated genes.

1191

| Gene symbol         | Gene name                                                   | Fold change |
|---------------------|-------------------------------------------------------------|-------------|
| Dlk1                | Delta-like 1 homolog (Drosophila)                           | 137.9       |
| Serpine2            | Serine (or cysteine) peptidase inhibitor, clade E, member 2 | 118.2       |
| Dpt                 | Dermatopontin                                               | 95.7        |
| Ly6a                | Lymphocyte antigen 6 complex, locus A                       | 54.3        |
| H19                 | H19                                                         | 51.1        |
| Cd34                | CD34 antigen                                                | 47.8        |
| Lum                 | Lumican                                                     | 36.6        |
| Lgmn                | Legumain                                                    | 31.8        |
| Cxcl12              | Chemokine (C-X-C motif) ligand 12                           | 26.1        |
| Mfap5               | Microfibrillar associated protein 5                         | 22.5        |
| Ly6c1               | Lymphocyte antigen 6 complex, locus C1                      | 21.7        |
| Igf2                | Insulin-like growth factor 2                                | 21.4        |
| Serping1            | Serine (or cysteine) peptidase inhibitor, clade G, member 1 | 19.2        |
| Mgst1               | Microsomal glutathione S-transferase 1                      | 18.3        |
| Aspn                | Asporin                                                     | 15.9        |
| Mt1                 | Metallothionein 1                                           | 15.4        |
| Mgst3               | Microsomal glutathione S-transferase 3                      | 13.1        |
| Col3a1 <sup>δ</sup> | Collagen, type III, alpha 1                                 | 13.0        |
| Postn               | Periostin, osteoblast specific factor                       | 13.0        |
| Itn2a               | Integral membrane protein 2A                                | 12.7        |
| Ptn                 | Pleiotrophin                                                | 10.3        |
| Rps18-ps3           | Ribosomal protein S18, pseudogene 3                         | 9.7         |
| Gsn                 | Gelsolin                                                    | 8.3         |
| Ifitm3              | Interferon induced transmembrane protein 3                  | 8.2         |
| Col5a1 <sup>δ</sup> | Collagen, type V, alpha 1                                   | 8.1         |

1192 Note:  $\delta$ =genes related to tendons.

1193

1194

1195

1196

1197

1198

1199

1200

1201

1202 **Supplementary files**

1203

1204

1205

1206

1207

1208

1209

1210

1211

1212

1213

1214

1215

1216

1217

1218

1219

1220

1221

1222



1223 **Fig S1. Fragmentation and elimination of lateral tendons in mutant neonates.** (A) Rapid  
1224 disruption of lateral extensor tendons in neonatal stages of mutant pups revealed by  
1225 examination of forelimb tendons using the tendon reporter ScxGFP. The extensor carpi radialis  
1226 longus tendon (yellow arrowheads) is present in a mutant pup at P0 but lost in a P1 mutant. (B)  
1227 TEM images of the extensor carpi radialis longus tendon at wrist level. The mutant tendon  
1228 shows signs of fragmentation already at P0, and by P3 the tendon appears disintegrated  
1229 accompanied by complete loss of the epitenon and structural definition of the tendon  
1230 circumference. The red dotted line in (B) demarcates the mutant tendon. Mutant: CKO,  
1231 Heterozygous: Het.

1232

1233

1234

1235

1236

1237

1238

1239

1240  
1241  
1242  
1243  
1244  
1245  
1246  
1247  
1248  
1249  
1250  
1251  
1252  
1253  
1254  
1255  
1256  
1257  
1258  
1259  
1260  
1261  
1262  
1263  
1264  
1265  
1266  
1267  
1268  
1269  
1270  
1271  
1272  
1273  
1274  
1275  
1276  
1277  
1278  
1279  
1280



**Fig S2. Disruption of the flexor carpi radialis tendon in mutant embryos.** Examination of flexor tendons in E16.5 (A) mutant and (B) heterozygous littermates using the tendon reporter ScxGFP. Boxed regions in (A) and (B) are shown enlarged in (A') and (B'). While most tendons appeared normal in mutant embryos, starting at E16.5 the flexor carpi radialis tendon (red arrowheads) was consistently torn in mutant embryo. Mutant: CKO, Heterozygous: Het. Figures not to scale.



1281  
1282  
1283  
1284  
1285  
1286  
1287  
1288  
1289  
1290  
1291  
1292  
1293  
1294  
1295  
1296  
1297  
1298  
1299  
1300  
1301  
1302  
1303  
1304  
1305  
1306  
1307  
1308  
1309  
1310  
1311  
1312  
1313  
1314  
1315  
1316  
1317  
1318  
1319  
1320

**A Apoptosis detection assay – TUNEL**



**B Proliferation detection assay – EdU**



**C Staining for detection of transdifferentiation**



**Fig S3. Evaluating cell death, proliferation and transdifferentiation in mutant tendons.** (A) TUNEL assay did not detect significant cell death in mutant tendons. The extensor digitorum communis tendons are demarcated in a transverse section of P7 mutant forelimb. Inset in (A) shows a transverse section of E14.5 forelimb paw that serves as a positive control for TUNEL staining. As expected, cell death is detected only at the distal edge of the autopod, but not in tendons (ScxGFP) at this stage. (B) EdU labeling of proliferating cells in transverse sections of the forelimb from P3 pups. The rate of proliferation was also not altered in mutant tendons compared with the wild-type littermates. The pups were injected i.p. with 100  $\mu$ g of EdU in PBS and tissues were harvested two hour post injection. (C) Histological staining for the prototypic markers of chondrocytes (toluidine blue), osteocytes (alizarin red) and adipocytes (oil-red-o) showed that the loss of tendon markers in mutant tenocytes was also not due to transdifferentiation. The positive control tissues for the respective staining are cartilage, adipose tissue and bone from the same section. Dotted lines demarcate tendons. Mutant: CKO, Wild-type: WT. Figures not to scale.

1321  
1322  
1323  
1324  
1325  
1326  
1327  
1328  
1329  
1330  
1331  
1332  
1333  
1334  
1335  
1336  
1337  
1338  
1339  
1340  
1341  
1342  
1343  
1344  
1345  
1346  
1347  
1348  
1349  
1350  
1351  
1352  
1353  
1354  
1355  
1356  
1357  
1358  
1359  
1360  
1361  
1362



**Fig S4. Expression of Sca-1 and CD44 during embryonic tendon development.** (A-D) Immunofluorescence staining for Sca-1 and CD44 on wrist-level transverse sections from E14.5 ScxGFP-carrying wild-type embryos. Robust expression of (B) Sca-1 and (D) CD44 was detected in cells that surround the tendons at E14.5 (boxed areas), likely the precursors of the epitenon/paratenon. (B', D') Higher magnification views of the boxed areas in (B) and (D). The epitenon/paratenon layer is indicated by white arrowheads. Note that both markers were not expressed by the tenocytes at E14.5, the onset of tenocyte differentiation or at any other stages during embryonic tendon development (not shown). Scale bars, 100  $\mu\text{m}$  (A-D) and 25  $\mu\text{m}$  (B', D').

1363

1364

1365

1366

1367

1368

1369

1370

1371

1372

1373

1374

1375

1376

1377

1378

1379

1380

1381

1382

1383

1384

1385

1386

1387

1388

1389

1390

1391

1392

1393

1394

1395

1396

1397

1398

1399

1400

1401

1402



**Fig S5. Induction of tendon markers by TGF $\beta$  signaling is context dependent.** AAV1-Tgfbr2-FLAG viral infection resulted in constitutive expression Tgfbr2-FLAG expression in cells both within and outside of tendons. The virus was injected locally into P1 mutant limbs and the limbs were harvested at P7. Sections from infected limbs were stained with antibodies to FLAG (yellow) to detect infected cells, and TGF $\beta$  type II receptor (TGFBR2) to confirm the re-expression of the receptor. ScxGFP signal and tenomodulin (Tnmd) antibody staining were used to identify induction of tendon markers. (A) Infected mutant tendon cells expressed the tendon markers ScxGFP and Tnmd. (B) In cells located outside of tendons (demarcated lines), the viral infection as detected by positive FLAG and TGFBR2 immunofluorescence did not result in induction of the tendon markers ScxGFP and Tnmd. Figures not to scale.

1403 **Table S1. List of primary antibodies used for immunofluorescence staining.**

| Primary antibody             | Host    | Dilution | Company (Cat number)                 | Pre-treatment                   |
|------------------------------|---------|----------|--------------------------------------|---------------------------------|
| Alpha-smooth muscle actin    | Rabbit  | 1:500    | Abcam (ab5694)                       | Permeabilization                |
| CD34 (Clone RAM34)           | Rat     | 1:200    | BD Pharmingen (553731)               | Antigen retrieval               |
| CD44 (Clone IM7)             | Rat     | 1:40     | BD Biosciences (550538)              | Cold acetone for 10 min at -20C |
| CD90.2 (Clone 53-2.1)        | Rat     | 1:40     | BD Biosciences (550543)              | Permeabilization                |
| FLAG (DYKDDDDK)              | Rabbit  | 1:200    | ThermoFisher (740001)                | Antigen retrieval               |
| FLAG (DYKDDDDK)              | Rat     | 1:100    | Novus Biologicals Inc (NBP1-06712SS) | Antigen retrieval               |
| Nestin                       | Chicken | 1:2000   | Aves Labs Inc (NES)                  | -                               |
| Nucleostemin                 | Goat    | 1:300    | Neuromics (GT-15050)                 | Permeabilization                |
| Oct3/4                       | Rabbit  | 1:250    | Santa Cruz (sc-9081)                 | Permeabilization                |
| Sca-1/Ly6                    | Goat    | 1:80     | R&D Systems (AF1226)                 | -                               |
| Sca-1/Ly6                    | Rat     | 1:50     | R&D Systems (MAB1226)                | -                               |
| Sox-2                        | Goat    | 1:250    | Santa Cruz (sc-17320)                | Permeabilization                |
| Sox-9                        | Rabbit  | 1:150    | Millipore (AB5535)                   | Permeabilization                |
| Tenomodulin (C-20)           | Goat    | 1:50     | Santa Cruz (sc-49324)                | Antigen retrieval               |
| TGF $\beta$ type II receptor | Rabbit  | 1:250    | Bioworld Inc (BS1360)                | -                               |
| V5                           | Rabbit  | 1:500    | Abcam (ab206566)                     | Antigen retrieval               |
| V5                           | Rat     | 1:500    | Abcam (ab206570)                     | Antigen retrieval               |

1404 Note:

1405 1) Permeabilization: Incubated with 0.3% Triton X-100 for 10 min.

1406 2) Antigen retrieval: Incubated with warm citrate buffer (10 mM sodium citrate with 0.05% Tween 20, pH 6) at  
 1407 550W, 50°C for 5 min using a PELCO BioWave®.

1408

1409

1410

1411

1412

1413

1414

1415  
1416 **Table S2. Differentially expressed genes (2-fold change, adjusted  $p < 0.05$ ) in P7 Tgfbr2;ScxCre**  
1417 **mutant tendon cells compared with P7 wild-type tenocytes.** Note that the expression level  
1418 detected for Scx also included that of ScxGFP, and therefore do not reflect the expression level  
1419 of endogenous Scx.

1420 >> [See the attached excel file "Table S2-DEGs in P7 mutant cells"](#).  
1421  
1422  
1423  
1424  
1425  
1426  
1427  
1428  
1429  
1430  
1431  
1432  
1433  
1434  
1435  
1436  
1437  
1438  
1439  
1440  
1441  
1442  
1443  
1444  
1445  
1446  
1447  
1448  
1449  
1450  
1451

**Table S3. Gene Ontology (GO) term enrichment of differentially expressed genes in P7 Tgfb $\beta$ 2;ScxCre mutant cells compared with P7 wild-type tenocytes.** A complete list of differentially expressed genes (2-fold change,  $p < 0.05$ ) used for the analysis is available in Table S2.

(A) Upregulated genes

| GO ID      | GO terms (biological process)                                              | <i>p</i> -value | Genes annotated to the term                                               | Count |
|------------|----------------------------------------------------------------------------|-----------------|---------------------------------------------------------------------------|-------|
| GO:2000146 | negative regulation of cell motility                                       | 4.77E-07        | <i>Cxcl12/Col3a1/Ptn/Nbl1/Apod/Sfrp2/Igfbp3/Apoe/Igfbp5</i>               | 9     |
| GO:0061041 | regulation of wound healing                                                | 1.34E-06        | <i>Serpine2/Cd34/Serping1/Gsn/Plpp3/Apoe/Anxa1</i>                        | 7     |
| GO:0042060 | wound healing                                                              | 1.38E-06        | <i>Serpine2/Cd34/Serping1/Col3a1/Gsn/Col5a1/Igf1/Apoe/Anxa1/Naca</i>      | 10    |
| GO:0009611 | response to wounding                                                       | 1.61E-06        | <i>Serpine2/Cd34/Serping1/Col3a1/Gsn/Col5a1/Igf1/Apoe/Mmp2/Anxa1/Naca</i> | 11    |
| GO:0043567 | regulation of insulin-like growth factor receptor (IGFR) signaling pathway | 2.18E-06        | <i>Igf1/Igfbp3/Igfbp5/Igfbp4</i>                                          | 4     |
| GO:0031099 | regeneration                                                               | 9.23E-06        | <i>Cxcl12/Igf1/Apoe/Mmp2/Anxa1/Naca</i>                                   | 6     |
| GO:0050900 | leukocyte migration                                                        | 2.83E-05        | <i>Cd34/Cxcl12/Nbl1/Apod/Anxa1/Cxcl14/Mmp14/Rps19</i>                     | 8     |
| GO:0048771 | tissue remodeling                                                          | 7.54E-05        | <i>Dlk1/Igf1/Igfbp5/Mmp2/Anxa1/Mmp14</i>                                  | 6     |

**Table S3 (Continued). Gene Ontology (GO) term enrichment of differentially expressed genes in P7 Tgfr2;ScxCre mutant cells compared with P7 wild-type tenocytes.**

(B) Downregulated genes

| GO ID      | GO terms (biological process)     | <i>p</i> -value | Genes annotated to the term                                                                                   | Count |
|------------|-----------------------------------|-----------------|---------------------------------------------------------------------------------------------------------------|-------|
| GO:0030199 | collagen fibril organization      | 1.86E-17        | <i>Col11a2/Scx/Col2a1/P4ha1/Loxl2/Col11a1/Col1a1/Col1a2/Lox/P3h4/Serpinh1</i>                                 | 11    |
| GO:0030198 | extracellular matrix organization | 5.57E-16        | <i>Col11a2/Scx/Col2a1/P4ha1/Loxl2/Col11a1/Mfap4/Col1a1/Col1a2/Lox/Abi3bp/Creb3l1/Comp/P3h4/Tgfb1/Serpinh1</i> | 16    |
| GO:0070208 | protein heterotrimerization       | 1.44E-08        | <i>Col1a1/Col1a2/Col6a2/Col6a1/C1qtnf6</i>                                                                    | 5     |
| GO:0032964 | collagen biosynthetic process     | 4.92E-08        | <i>Scx/Col1a1/Creb3l1/P3h4/Serpinh1/P3h3</i>                                                                  | 6     |
| GO:0032963 | collagen metabolic process        | 8.63E-08        | <i>Scx/Mfap4/Col1a1/Creb3l1/P3h4/Serpinh1/P3h3</i>                                                            | 7     |
| GO:0070206 | protein trimerization             | 1.60E-07        | <i>Col1a1/Col1a2/C1qtnf3/Col6a2/Col6a1/C1qtnf6</i>                                                            | 6     |
| GO:0018126 | protein hydroxylation             | 1.79E-06        | <i>P4ha1/Crtap/P3h4/P3h3</i>                                                                                  | 4     |
| GO:0001501 | skeletal system development       | 6.72E-06        | <i>Col11a2/Scx/Col2a1/Loxl2/Col11a1/Col1a1/Col1a2/Sparc/Comp/Vkorc1/Serpinh1</i>                              | 11    |
